# Supplementary material for: Instruction of haematopoietic lineage choices, evolution of transcriptional landscapes and cancer stem cell hierarchies derived from an AML1-ETO mouse model
Source: PubMed Central journal article supplement (PMC3914523; doi:10.1002/emmm.201302661), 2013-10-04
Supplement: emmm0005-1804-sd2.pdf [file emmm0005-1804-sd2.pdf]

## **SUPPLEMENTARY DATA**

### **TABLE OF CONTENTS**

|                                               |                   |
|-----------------------------------------------|-------------------|
| <b>Supplementary figures</b>                  | <b>page 2-20</b>  |
| <b>Information about supplementary tables</b> | <b>page 21</b>    |
| <b>Materials and Methods</b>                  | <b>page 22-30</b> |
| <b>References for Materials and Methods</b>   | <b>page 31-33</b> |

## SUPPLEMENTARY FIGURES

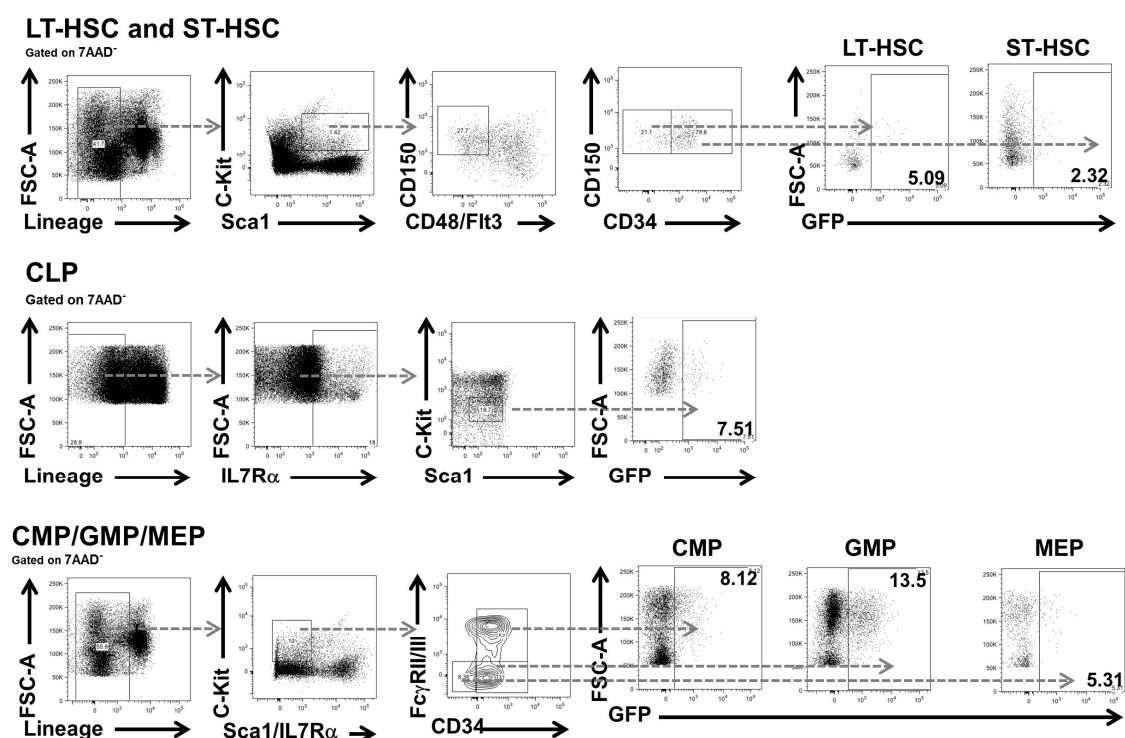

### Percentage of GFP<sup>+</sup> cells in each lineage (relative % of gated cells)

| Population               | LT-HSC           |                  | ST-HSC           |                  | CLP              |                  | CMP              |                  | GMP              |                  | MEP              |                  |
|--------------------------|------------------|------------------|------------------|------------------|------------------|------------------|------------------|------------------|------------------|------------------|------------------|------------------|
|                          | GFP <sup>+</sup> | GFP <sup>-</sup> | GFP <sup>+</sup> | GFP <sup>-</sup> | GFP <sup>+</sup> | GFP <sup>-</sup> | GFP <sup>+</sup> | GFP <sup>-</sup> | GFP <sup>+</sup> | GFP <sup>-</sup> | GFP <sup>+</sup> | GFP <sup>-</sup> |
| Number of animals tested | 4                | 4                | 4                | 4                | 4                | 4                | 4                | 4                | 4                | 4                | 4                | 4                |
| Mean percentage          | 2.15             | 97.85            | 2.465            | 97.535           | 9.44             | 90.56            | 8.94             | 91.06            | 7.093            | 92.907           | 4.78             | 95.22            |
| Standard deviation       | 1.244            | 98.756           | 1.763            | 98.237           | 5.175            | 94.825           | 0.7614           | 99.2386          | 6.362            | 93.638           | 1.874            | 98.126           |
| Standard error of mean   | 0.622            | 99.378           | 0.8817           | 99.1183          | 2.588            | 97.412           | 0.3807           | 99.6193          | 3.181            | 96.819           | 0.9369           | 99.0631          |

### Supplementary Figure 1A: The R26/AE mouse model directs GFP transgene expression to a subset of HSC and blood cell progenitors

Representative FACS profiles of BM cells from R26/AE reconstituted C57BL/6 mice that have been DOX-induced for ten days are depicted. FACS plots showing LT- and ST-HSC were gated on 7AAD<sup>-</sup>/L<sup>-</sup>K<sup>+</sup>S<sup>+</sup>/CD48<sup>-</sup>/Flt3<sup>-</sup>/CD150<sup>+</sup> cells and subclassified for the expression of CD34<sup>-</sup> (LT-HSC) and CD34<sup>+</sup> (ST-HSC). The CLP fraction was gated for 7AAD<sup>-</sup>/L<sup>-</sup>K<sup>int</sup>S<sup>int</sup>/IL7receptor α<sup>+</sup> cells. GMP, CMP and MEP were gated on 7AAD<sup>-</sup>/L<sup>-</sup>K<sup>+</sup>S<sup>-</sup>/IL7 receptor α<sup>-</sup> cells and subclassified based on the expression of Fcγ receptor and CD34. Numbers indicate the percentage of GFP<sup>+</sup> cells within each population. The table at the bottom shows the number of animals that were analysed, mean percentages of GFP<sup>+</sup> and GFP<sup>-</sup> cells, standard deviations and standard errors of mean for LT-, ST-HSC and lineage restricted blood cell progenitors.

B

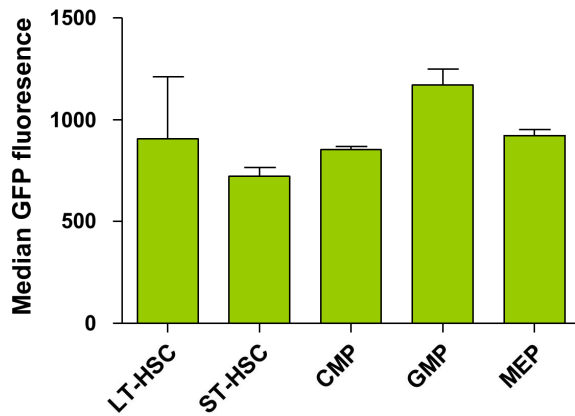

**Median GFP fluorescence of LT-HSC, ST-HSC, CMP, GMP and MEP**

| Gating                   | GFP+ cells |        |       |       |       |
|--------------------------|------------|--------|-------|-------|-------|
|                          | LT-HSC     | ST-HSC | CMP   | GMP   | MEP   |
| Population               |            |        |       |       |       |
| Number of animals tested | 4          | 4      | 4     | 4     | 4     |
| Median GFP fluorescence  | 904.8      | 721.5  | 851.8 | 1171  | 925.8 |
| Standard deviation       | 617        | 85.77  | 31.75 | 155.8 | 56.81 |
| Standard error           | 308.5      | 42.88  | 15.88 | 77.92 | 28.4  |

**Supplementary Figure 1B: Median fluorescence of GFP<sup>+</sup> haematopoietic stem cells and lineage-restricted blood cell progenitors**

Median fluorescence values of GFP<sup>+</sup> LT-, ST-HSC, CMP, GMP and MEP populations from four R26/AE reconstituted C57BL/6 mice that have been DOX-induced for ten days are depicted in the graph on the top. LT- and ST-HSC were gated on 7AAD<sup>-</sup>/L<sup>-</sup>K<sup>+</sup>S<sup>+</sup>/CD48<sup>-</sup>/Flt3<sup>-</sup>/CD150<sup>+</sup>/GFP<sup>+</sup> cells and subclassified for the expression of CD34<sup>-</sup> (LT-HSC) and CD34<sup>+</sup> (ST-HSC). GMP, CMP and MEP were gated on 7AAD<sup>-</sup>/L<sup>-</sup>K<sup>+</sup>S<sup>-</sup>/ IL7 receptor  $\alpha$ <sup>-</sup>/GFP<sup>+</sup> expression and subclassified based on the expression of Fc $\gamma$  receptor and CD34. The median fluorescence is represented as the relative intensity value below which 50% of the events were found within each population. The table at the bottom shows the number of animals that were analysed, median GFP fluorescence values, standard deviations and standard errors.

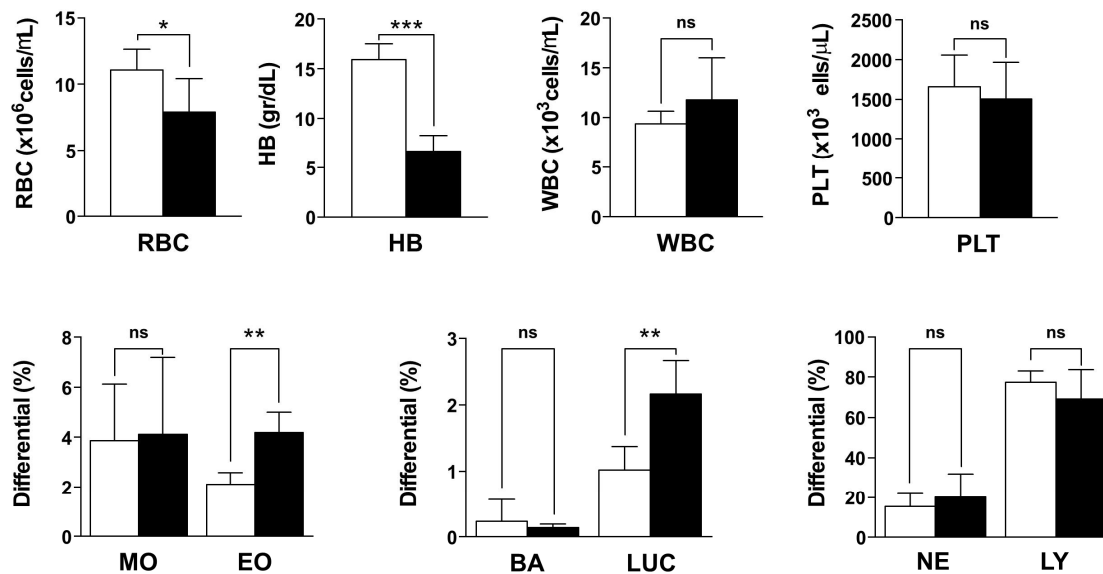

**Peripheral blood parameters**

| Population                | RBC     |       | HB      |        | WBC     |       | PLT     |       | MO      |       | EO      |        | BA      |         | LUC     |        | NE      |       | LY      |       |        |
|---------------------------|---------|-------|---------|--------|---------|-------|---------|-------|---------|-------|---------|--------|---------|---------|---------|--------|---------|-------|---------|-------|--------|
|                           | Control | AE    | Control | AE     | Control | AE    | Control | AE    | Control | AE    | Control | AE     | Control | AE      | Control | AE     | Control | AE    | Control | AE    |        |
| Number of animals tested  | 5       | 5     | 5       | 5      | 5       | 5     | 5       | 5     | 5       | 5     | 5       | 5      | 6       | 5       | 6       | 5      | 5       | 5     | 5       | 5     | 5      |
| Mean                      | 11,08   | 7,880 | 15,90   | 6,664  | 9,368   | 11,81 | 1554    | 1504  | 3,860   | 4,120 | 2,100   | 4,180  | 0,2333  | 0,1400  | 1,017   | 2,160  | 15,48   | 20,24 | 77,58   | 69,12 |        |
| Standard deviation        | 1,563   | 2,532 | 1,624   | 1,594  | 1,270   | 4,232 | 420,2   | 460,7 | 2,270   | 3,073 | 0,4690  | 0,8228 | 0,3327  | 0,05477 | 0,3545  | 0,5595 | 6,491   | 11,56 | 5,384   | 14,69 |        |
| Standard error of mean    | 0,6990  | 1,132 | 0,7261  | 0,7128 | 0,5679  | 1,893 | 187,9   | 206,0 | 1,015   | 1,374 | 0,2098  | 0,3680 | 0,1358  | 0,02449 | 0,1447  | 0,2502 | 2,903   | 5,169 | 2,408   | 6,570 |        |
| P value summary           | *       |       | ***     |        | ns      |       | ns      |       | ns      |       | **      |        | ns      |         | **      |        | ns      |       | ns      |       | ns     |
| P value (unpaired t test) | 0,043   |       | <0,0001 |        | 0,2519  |       | 0,8633  |       | 0,8828  |       | 0,0012  |        | 0,5538  |         | 0,0026  |        | 0,4452  |       | 0,2611  |       | 0,2611 |

## Supplementary Figure 2: Peripheral blood parameters in control and AE-expressing mice

The bar diagrams show mean peripheral blood parameters  $\pm$ SD from R26/AE reconstituted RAG2<sup>-/-</sup> control mice without DOX exposure (white bars) and reconstituted animals that have been DOX-induced during nine months (black bars). RBC, red blood cell count; HB, haemoglobin; WBC, white blood cell count; PLT, platelet count; MO, monocyte count; EO, eosinophil count; BA, basophil count; LUC, large myeloperoxidase-negative cell count; NE, neutrophil count; LY, lymphocyte count. The table at the bottom shows the number of animals that were analysed, mean percentages, standard deviations and standard errors of mean, p value summaries and p values for each peripheral blood cell parameter.

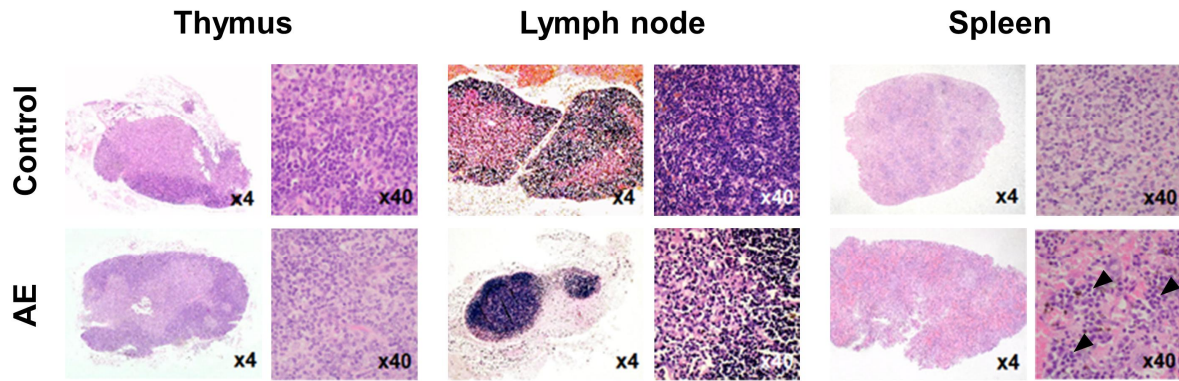

**Supplementary Figure 3: Histological sections through haematopoietic organs from control and AE-expressing mice**

Representative H&E-stained sections from R26/AE reconstituted RAG2<sup>-/-</sup> control mice without DOX exposure (upper panel) and reconstituted animals that have been DOX-induced during nine months (lower panel) are shown for the thymus, the lymph nodes and the spleen. For each organ the general appearance (x4) together with a higher magnification (x40) are shown. The apparent increase in erythropoiesis in the red pulp of the AE-expressing animal is indicated by black arrowheads.

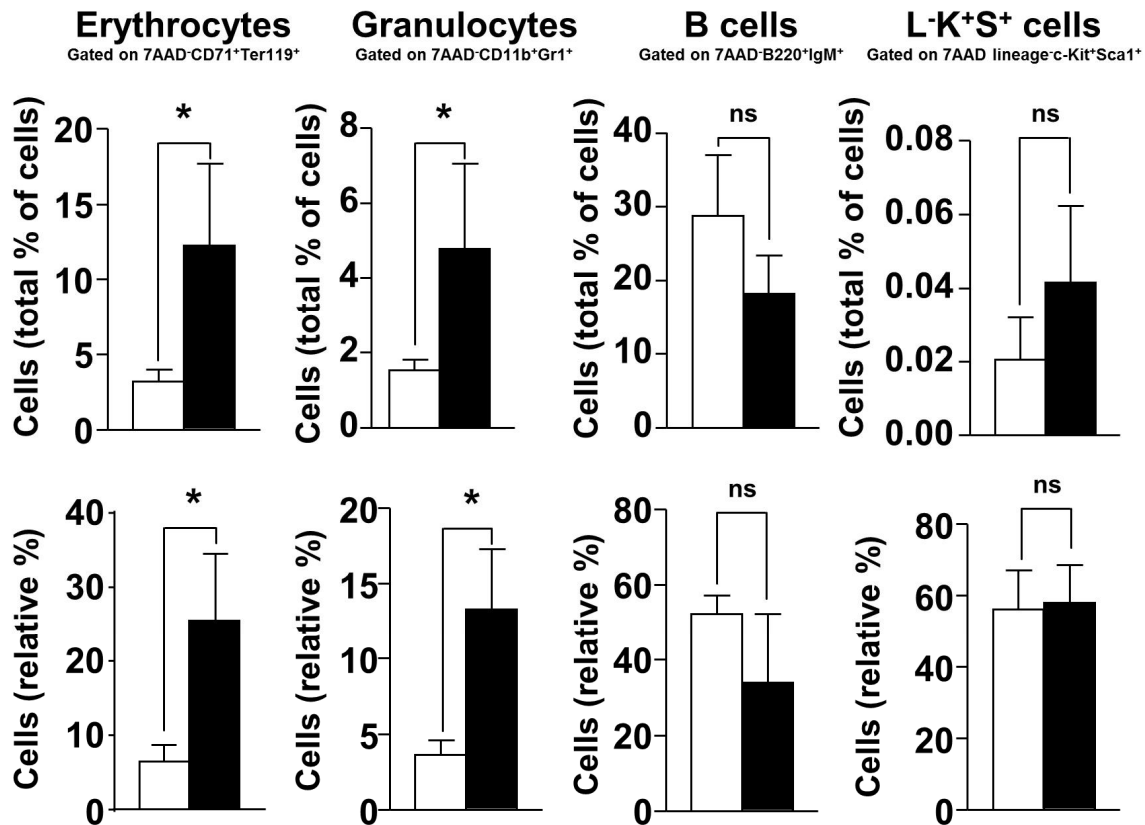

**Flow cytometry of the spleen (absolute % of total splenic cells)**

| Population                | Erythrocytes |       | Granulocytes |       | B cells |       | L-K+S+   |          |
|---------------------------|--------------|-------|--------------|-------|---------|-------|----------|----------|
|                           | Control      | AE    | Control      | AE    | Control | AE    | Control  | AE       |
| Number of animals tested  | 3            | 3     | 3            | 4     | 5       | 4     | 5        | 5        |
| Mean                      | 3.22         | 12.29 | 1.523        | 4.775 | 28.8    | 18.25 | 0.0206   | 0.0416   |
| Standard deviation        | 0.7817       | 5.381 | 0.293        | 2.261 | 8.244   | 5.173 | 0.01133  | 0.02057  |
| Standard error of mean    | 0.4513       | 3.106 | 0.1691       | 1.13  | 3.687   | 2.587 | 0.005066 | 0.009201 |
| P value summary           | *            |       | *            |       | ns      |       | ns       |          |
| P value (unpaired t test) | 0.0446       |       | 0.034        |       | 0.0621  |       | 0.0806   |          |

**Flow cytometry of the spleen (relative % of gated cells)**

| Population                | Erythrocytes |       | Granulocytes |       | B cells |       | L-K+S+  |       |
|---------------------------|--------------|-------|--------------|-------|---------|-------|---------|-------|
|                           | Control      | AE    | Control      | AE    | Control | AE    | Control | AE    |
| Number of animals tested  | 3            | 3     | 3            | 4     | 5       | 5     | 5       | 5     |
| Mean                      | 6.533        | 25.53 | 3.657        | 13.3  | 52.42   | 33.89 | 56.2    | 58.1  |
| Standard deviation        | 2.206        | 9.473 | 0.9354       | 3.981 | 4.766   | 18.53 | 10.9    | 10.38 |
| Standard error of mean    | 1.274        | 5.469 | 0.5401       | 1.99  | 2.132   | 8.286 | 4.873   | 4.641 |
| P value summary           | *            |       | *            |       | ns      |       | ns      |       |
| P value (unpaired t test) | 0.0277       |       | 0.0101       |       | 0.0623  |       | 0.7848  |       |

#### Supplementary Figure 4: Flow cytometric analysis of extramedullary haematopoiesis in control and AE-expressing spleens

The bar diagrams show total and relative percentages of erythrocytes, granulocytes, B and L<sup>-</sup>K<sup>+</sup>S<sup>+</sup> cells from R26/AE reconstituted RAG2<sup>-/-</sup> control mice without DOX exposure (white bars) and reconstituted animals that have been DOX-induced during nine months (black bars). In the upper row of plots the absolute percentages of cells within the population of nucleated spleen cells is shown. The lower plots depict the relative percentages of cells within each cell type that was analysed. The tables at the bottom contain information about the number of animals that were tested, mean absolute and relative percentages, standard deviations, standard errors of mean, p value summaries and p values for each cell type.

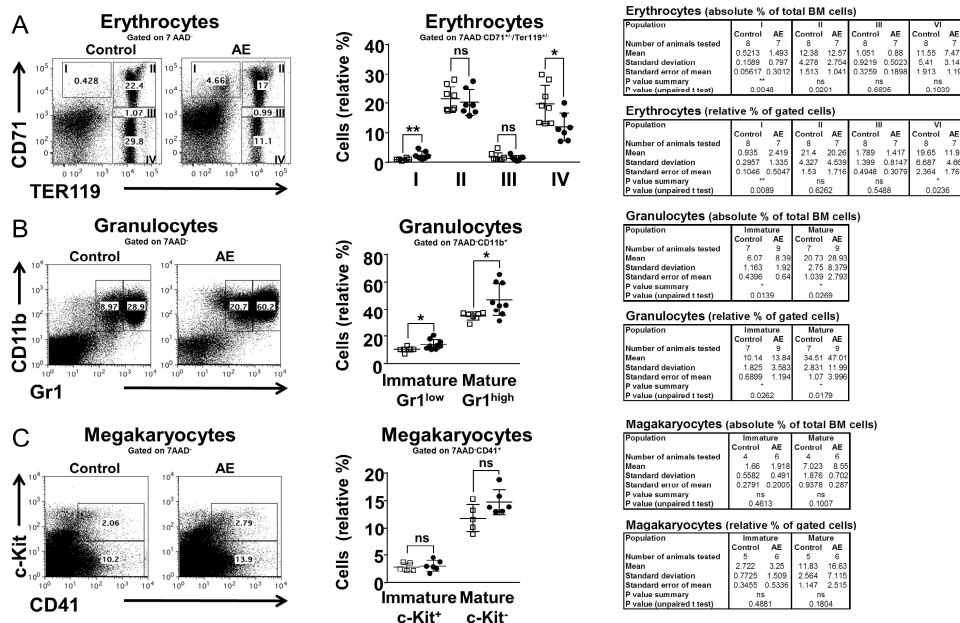

### Supplementary Figure 5: Flow cytometric analysis of control and AE-expressing mice reveals red blood cell lineage maturation defects and the expansion of granulocytes

(A) Representative FACS profiles of BM cells from R26/AE reconstituted RAG2<sup>-/-</sup> mice that have been DOX-induced for nine months are depicted on the left. FACS plots showing red blood cell maturation were gated on 7AAD<sup>-</sup> cells and subclassified into I (proerythroblasts, CD71<sup>+</sup>Ter119<sup>-</sup>); II (basophilic erythroblasts, CD71<sup>+</sup>Ter119<sup>+</sup>); III (late basophilic erythroblasts and chromatophilic erythroblasts, CD71<sup>int</sup>Ter119<sup>+</sup>) and IV (orthochromatophilic erythroblasts and reticulocytes, CD71<sup>+</sup>Ter119<sup>+</sup>). The graph shows relative percentages of control (white squares) and DOX-induced (black dots) cells within the four analysed red blood cell populations with each square and dot representing one individual mouse. The two tables on the right indicate mean absolute (upper table) and mean relative (lower table) cell percentages, the number of animals that were analysed, standard deviations, standard errors of mean, p value summaries and p values for each maturation stage.

(B) Representative FACS profiles of BM cells from R26/AE reconstituted RAG2<sup>-/-</sup> mice that have been DOX-induced for nine months are depicted on the left. FACS plots showing granulocytes were gated on 7AAD<sup>-</sup> cells and subclassified into immature (CD11b<sup>+</sup>Gr1<sup>low</sup>) and mature (CD11b<sup>+</sup>Gr1<sup>high</sup>) stages. The graph shows relative percentages of control (white squares) and DOX-induced (black dots) cells within the two analysed granulocytic populations with each square and dot representing one individual mouse. The two tables on the right indicate mean absolute (upper table) and mean relative (lower table) cell percentages, the number of animals that were analysed, standard deviations, standard errors of mean, p value summaries and p values for each maturation stage.

(C) Representative FACS profiles of BM cells from R26/AE reconstituted RAG2<sup>-/-</sup> mice that have been DOX-induced for nine months are depicted on the left. FACS plots showing megakaryocytes were gated on 7AAD<sup>-</sup> cells and subclassified into immature (CD41<sup>+</sup>c-Kit<sup>+</sup>) and mature (CD41<sup>+</sup>c-Kit<sup>-</sup>) stages. The graph shows relative percentages of control (white squares) and DOX-induced (black dots) cells within the two analysed megakaryocytic populations with each square and dot representing one individual mouse. The two tables on the right indicate mean absolute (upper table) and mean relative (lower table) cell percentages, the number of animals that were analysed, standard deviations, standard errors of mean, p value summaries and p values for each maturation stage.



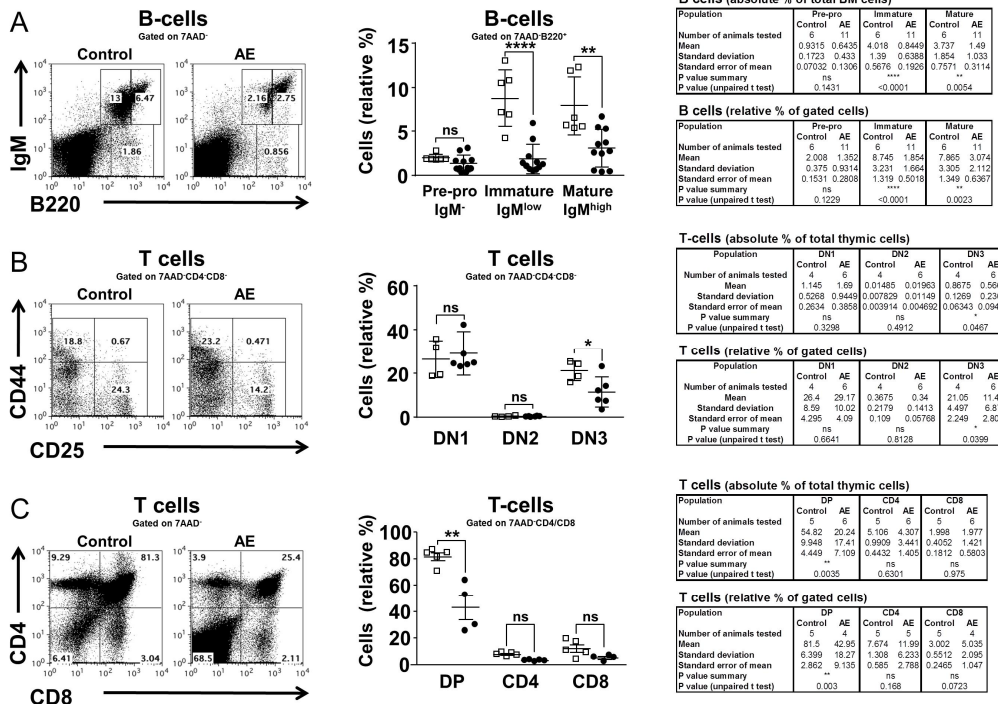

### Supplementary Figure 6: Flow cytometric analysis of control and AE-expressing mice reveals B and T cell maturation defects

(A) Representative FACS profiles of BM cells from R26/AE reconstituted RAG2<sup>-/-</sup> mice that have been DOX-induced for nine months are depicted on the left. FACS plots showing B cell maturation were gated on 7AAD<sup>-</sup> cells and subclassified into pre-pro (B220<sup>+</sup>/IgM<sup>-</sup>), immature (B220<sup>+</sup>/IgM<sup>low</sup>) and mature (B220<sup>+</sup>/IgM<sup>high</sup>) B cell maturation stages. The graph shows relative percentages of control (white squares) and DOX-induced (black dots) cells within the three analysed B cell populations with each square and dot representing one individual mouse. The two tables on the right indicate mean absolute (upper table) and mean relative (lower table) cell percentages, the number of animals that were analysed, standard deviations, standard errors of mean, p value summaries and p values for each maturation stage.

(B) Representative FACS profiles of thymic cells from R26/AE reconstituted RAG2<sup>-/-</sup> mice that have been DOX-induced for nine months are depicted on the left. FACS plots showing initial T cell maturation were gated on 7AAD<sup>-</sup>/CD4<sup>+</sup>/CD8<sup>-</sup> cells and subclassified into DN1 (CD44<sup>+</sup>/CD25<sup>-</sup>), DN2 (CD44<sup>+</sup>/CD25<sup>+</sup>) and DN3 (CD44<sup>-</sup>/CD25<sup>+</sup>) thymocytes. The graph shows relative percentages of control (white squares) and DOX-induced (black dots) cells within the three analysed T cell populations with each square and dot representing one individual mouse. The two tables on the right indicate mean absolute (upper table) and mean relative (lower table) cell percentages, the number of animals that were analysed, standard deviations, standard errors of mean, p value summaries and p values for each maturation stage.

(C) Representative FACS profiles of thymic cells from R26/AE reconstituted RAG2<sup>-/-</sup> mice that have been DOX-induced for nine months are depicted on the left. FACS plots showing T cell maturation were gated on 7AAD<sup>-</sup> cells and subclassified into DP (CD4<sup>+</sup>/CD8<sup>+</sup>), CD4 (CD4<sup>+</sup>/CD8<sup>-</sup>) and CD8 (CD4<sup>-</sup>/CD8<sup>+</sup>). The graph shows relative percentages of control (white squares) and DOX-induced (black dots) cells within the three analysed T cell populations with each square and dot representing one individual mouse. The two tables on the right indicate mean absolute (upper table) and mean relative (lower table) cell percentages, the number of animals that were analysed, standard deviations, standard errors of mean, p value summaries and p values for each maturation stage.



### LT-HSC and ST-HSC

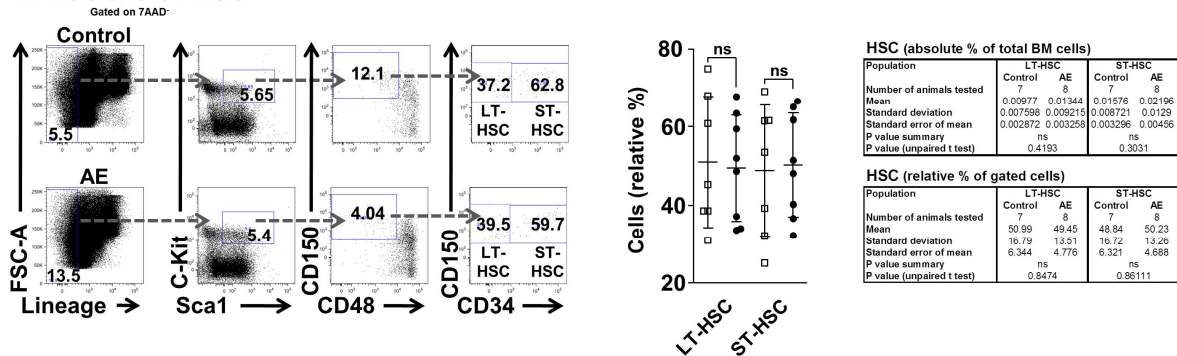

### Supplementary Figure 7: AE expression does not alter the haematopoietic stem cell compartment

Representative FACS profiles of BM cells from R26/AE reconstituted RAG2<sup>-/-</sup> mice that have been DOX-induced for nine months are depicted. FACS plots showing LT- and ST-HSC were gated on 7AAD<sup>-</sup>/L<sup>-</sup>K<sup>+</sup>S<sup>+</sup>/CD48<sup>-</sup>/CD150<sup>+</sup> cells and subclassified for the expression of CD34<sup>-</sup> (LT-HSC) and CD34<sup>+</sup> (ST-HSC). The graph shows relative percentages of control (white squares) and DOX-induced (black dots) cells within the LT- and ST-HSC populations with each square and dot representing one individual mouse. The two tables on the right indicate, mean absolute (upper table) and mean relative (lower table) cell percentages, the number of animals that were analysed, standard deviations, standard errors of mean, p value summaries and p values for LT- and ST-HSC.

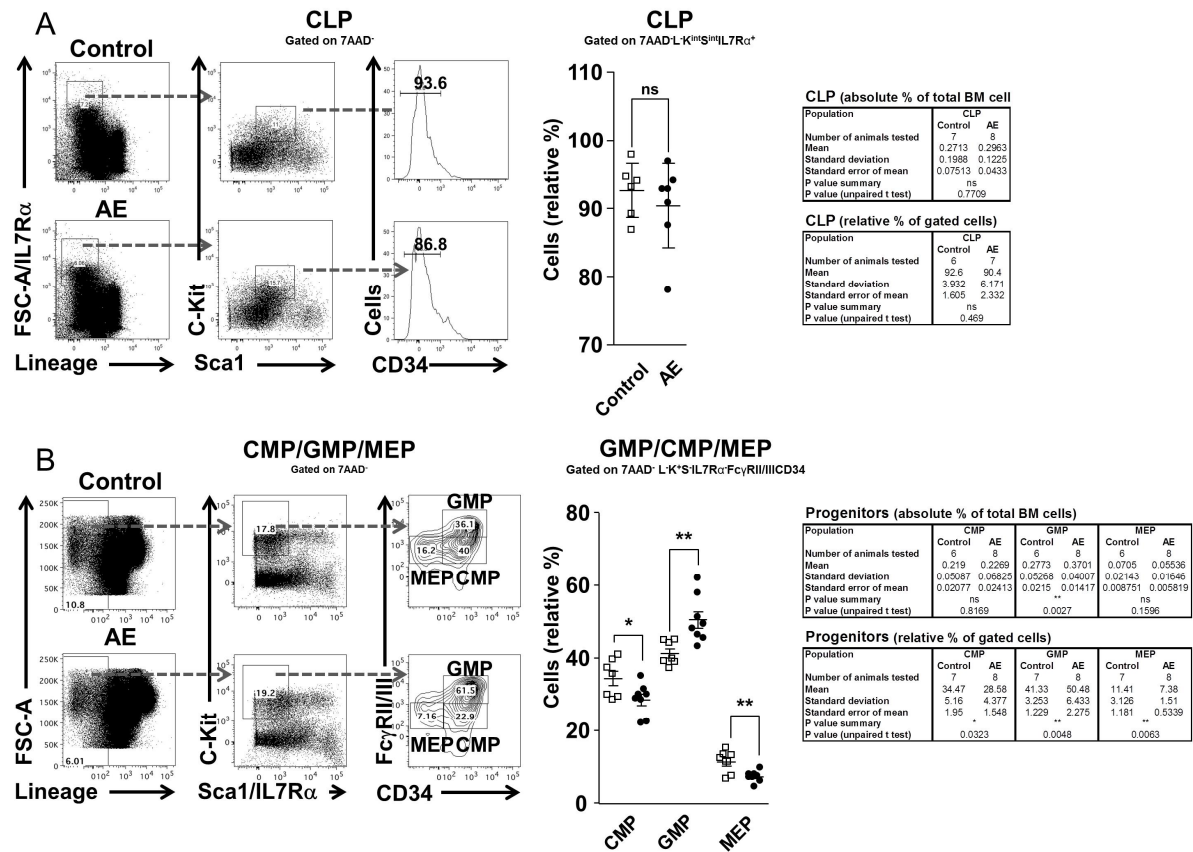

### Supplementary Figure 8: AE expression does not change CLP but alters the CMP, GMP and MEP pools of lineage-restricted progenitors

(A) Representative FACS profiles of BM cells from R26/AE reconstituted RAG2<sup>-/-</sup> mice that have been DOX-induced for nine months are depicted. FACS plots showing CLP were gated on 7AAD<sup>-</sup>/L<sup>-</sup>K<sup>int</sup>S<sup>int</sup>/IL7 receptor  $\alpha$ <sup>+</sup>. The graph shows relative percentages of control (white squares) and DOX-induced (black dots) cells within the CLP population with each square and dot representing one individual mouse. The two tables on the right indicate mean absolute (upper table) and mean relative (lower table) cell percentages, the number of animals that were analysed, standard deviations, standard errors of mean, p value summaries and p values for CLP.

(B) Representative FACS profiles of BM cells from R26/AE reconstituted RAG2<sup>-/-</sup> mice that have been DOX-induced for nine months are depicted. GMP, CMP and MEP were gated on 7AAD<sup>-</sup>/L<sup>-</sup>K<sup>int</sup>S<sup>int</sup>/IL7 receptor  $\alpha$ <sup>-</sup> expression and subclassified based on the expression of Fc $\gamma$  receptor and CD34/L<sup>-</sup>K<sup>int</sup>S<sup>int</sup>. The graph shows relative percentages of control (white squares) and DOX-induced (black dots) cells within the three analysed progenitor populations with each square and dot representing one individual mouse. The two tables on the right indicate mean absolute (upper table) and mean relative (lower table) cell percentages, the number of animals that were analysed standard deviations, standard errors of mean, p value summaries and p values for each progenitor population.

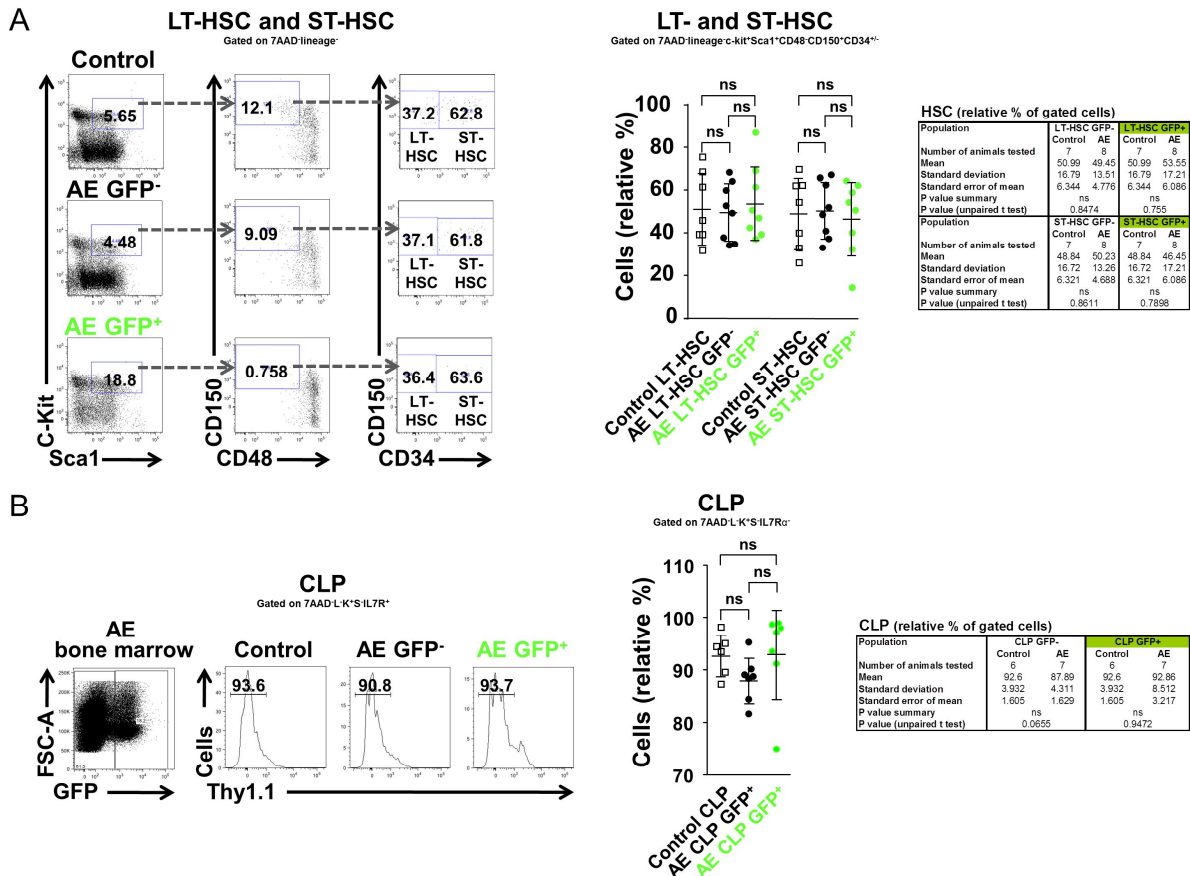

**Supplementary Figure 9: Analysis of GFP<sup>-</sup> and GFP<sup>+</sup> LT-, ST-HSC and CLP populations reveals no significant pool size differences between control and AE-expressing mice**

(A) Representative FACS profiles of BM cells from R26/AE reconstituted RAG2<sup>-/-</sup> mice that have been DOX-induced for nine months are depicted. FACS plots showing LT- and ST-HSC were gated on 7AAD<sup>-</sup>/L<sup>-</sup>K<sup>+</sup>S<sup>+</sup>/CD48<sup>-</sup>/CD150<sup>+</sup> cells and subclassified for the expression of CD34<sup>-</sup> (LT-HSC), CD34<sup>+</sup> (ST-HSC) and GFP. The graph shows relative percentages of control (white squares) and DOX-exposed GFP<sup>-</sup> (black dots) and GFP<sup>+</sup> (green dots) cells within the LT- and ST-HSC populations with each square and dot representing one individual mouse. The tables at the right show the number of animals that were analysed, mean percentages of control, GFP<sup>-</sup> and GFP<sup>+</sup> cells, standard deviations and standard errors of mean, p value summaries and p values for LT-HSC (upper table) and ST-HSC (lower table).

(B) Representative FACS profiles of BM cells from R26/AE reconstituted RAG2<sup>-/-</sup> mice that have been DOX-induced for nine months are depicted. FACS plots showing CLP were gated on 7AAD<sup>-</sup>/L<sup>-</sup>K<sup>+</sup>S<sup>+</sup>IL7 receptor  $\alpha$ <sup>+</sup> and subclassified for the expression of GFP. The graph shows relative percentages of control (white squares) and DOX-exposed GFP<sup>-</sup> (black dots) and GFP<sup>+</sup> (green dots) cells within the CLP population with each square and dot representing one individual mouse. The table indicates the number of animals that were analysed, mean percentages of control, GFP<sup>-</sup> and GFP<sup>+</sup> cells, standard deviations and standard errors of mean, p value summaries and p values for CLP.

## GMP/CMP/MEP

Gated on 7AAD<sup>-</sup>L<sup>-</sup>K<sup>+</sup>S<sup>-</sup>IL7R $\alpha$ <sup>-</sup>

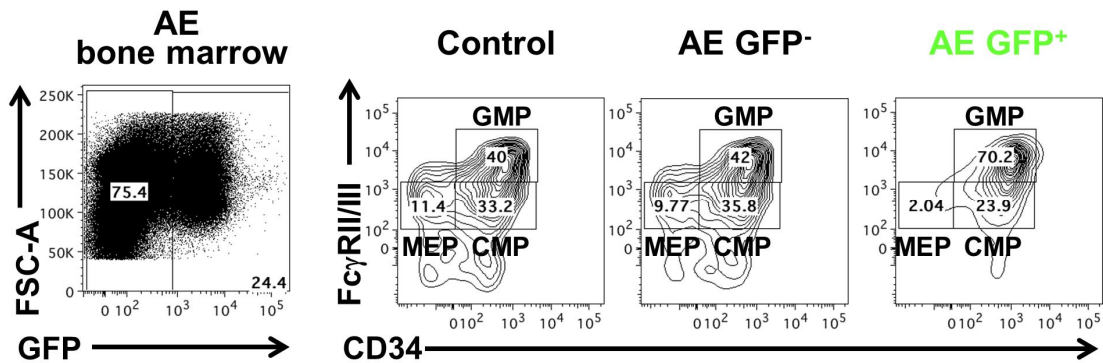

## GMP/CMP/MEP

Gated on 7AAD<sup>-</sup>L<sup>-</sup>K<sup>+</sup>S<sup>-</sup>IL7R $\alpha$ <sup>-</sup>

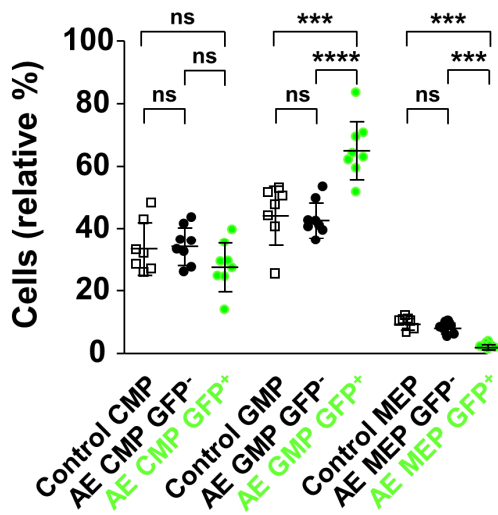

### Progenitors (relative % of gated cells)

| Population                | CMP GFP <sup>-</sup> |        | CMP GFP <sup>+</sup> |        |
|---------------------------|----------------------|--------|----------------------|--------|
|                           | Control              | AE     | Control              | AE     |
| Number of animals tested  | 7                    | 8      | 7                    | 8      |
| Mean                      | 33.33                | 34.03  | 33.33                | 27.5   |
| Standard deviation        | 8.513                | 6.177  | 8.513                | 7.753  |
| Standard error of mean    | 3.217                | 2.184  | 3.217                | 2.741  |
| P value summary           | ns                   |        | ns                   |        |
| P value (unpaired t test) | 0.8575               |        | 0.1884               |        |
| Population                | GMP GFP <sup>-</sup> |        | GMP GFP <sup>+</sup> |        |
|                           | Control              | AE     | Control              | AE     |
| Number of animals tested  | 7                    | 8      | 7                    | 8      |
| Mean                      | 44.16                | 42.7   | 44.16                | 65.03  |
| Standard deviation        | 9.56                 | 5.618  | 9.56                 | 9.321  |
| Standard error of mean    | 3.613                | 1.986  | 3.613                | 3.295  |
| P value summary           | ns                   |        | ***                  |        |
| P value (unpaired t test) | 0.7203               |        | 0.0009               |        |
| Population                | MEP GFP <sup>-</sup> |        | MEP GFP <sup>+</sup> |        |
|                           | Control              | AE     | Control              | AE     |
| Number of animals tested  | 7                    | 8      | 7                    | 8      |
| Mean                      | 9.213                | 7.845  | 9.213                | 1.862  |
| Standard deviation        | 1.919                | 1.789  | 1.919                | 0.7938 |
| Standard error of mean    | 0.7252               | 0.6326 | 0.7252               | 0.2806 |
| P value summary           | ns                   |        | ***                  |        |
| P value (unpaired t test) | 0.1767               |        | <0.0001              |        |

### Supplementary Figure 10: Relative percentages of GFP<sup>+</sup> but not GFP<sup>-</sup> GMP and MEP pools are altered in AE-expressing mice

Representative FACS profiles of BM cells from R26/AE reconstituted RAG2<sup>-/-</sup> mice that have been DOX-induced for nine months are depicted. The first plot shows the percentages of GFP<sup>-</sup> and GFP<sup>+</sup> cells in the BM of a DOX-induced mouse. In the other plots, control, DOX-exposed GFP<sup>-</sup> and GFP<sup>+</sup> GMP, CMP and MEP are shown that were gated on 7AAD<sup>-</sup>L<sup>-</sup>K<sup>+</sup>S<sup>-</sup>IL7R $\alpha$ <sup>-</sup> expression and subclassified based on the expression of Fc $\gamma$  receptor, CD34 and GFP. The graph at the left bottom shows relative percentages of control (white squares), DOX-exposed GFP<sup>-</sup> (black dots) and GFP<sup>+</sup> (green dots) cells within each progenitor population with each square and dot representing one individual mouse. The tables indicate the number of animals that were analysed, mean relative percentages of control, GFP<sup>-</sup> and GFP<sup>+</sup> cells, standard deviations and standard errors of mean, p value summaries and p values for CMP, GMP and MEP.

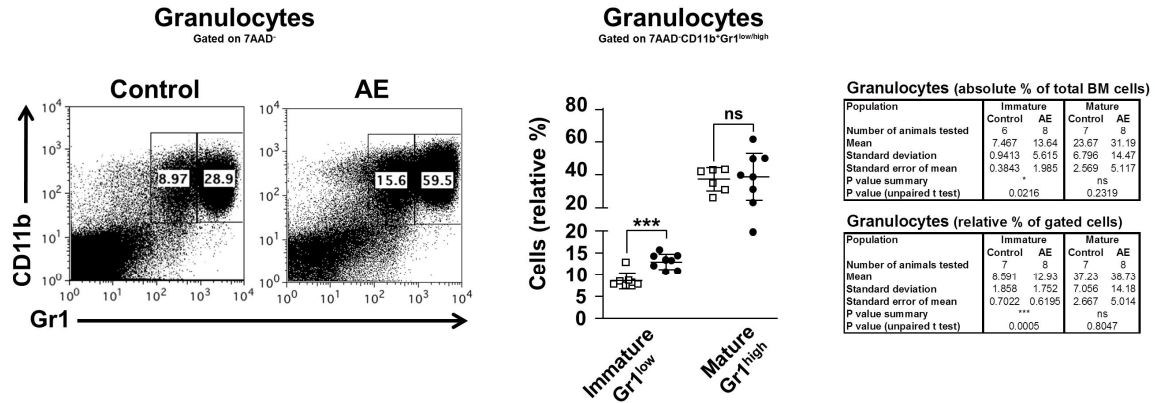

S

### Supplementary Figure 11: Immature granulocytes are increased in the BM of long-term AE-expressing mice

Representative FACS profiles of BM cells from R26/AE reconstituted C57BL/6 mice that have been DOX-induced for eighteen months are depicted on the left. FACS plots showing granulocytes were gated on 7AAD<sup>-</sup> cells and subclassified into immature (CD11b<sup>+</sup>Gr1<sup>low</sup>) and mature (CD11b<sup>+</sup>Gr1<sup>high</sup>) stages. The graph shows relative percentages of control (white squares) and DOX-induced (black dots) cells within the two analysed granulocytic populations with each square and dot representing one individual mouse. The two tables on the right indicate mean absolute (upper table) and mean relative (lower table) cell percentages, the number of animals that were analysed, standard deviations, standard errors of mean, p value summaries and p values for each maturation stage.

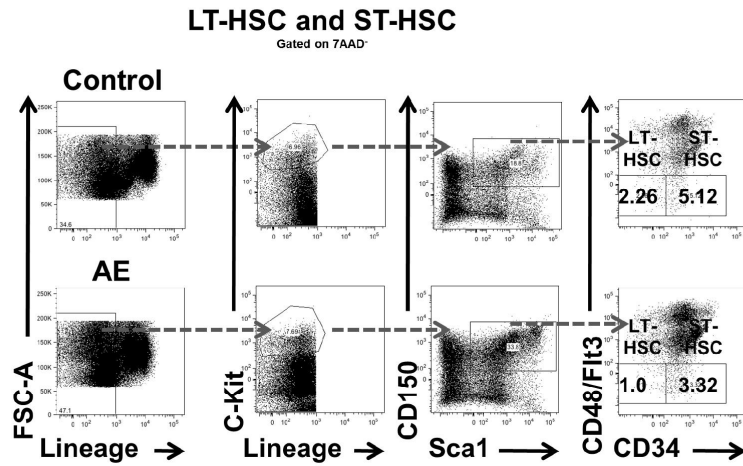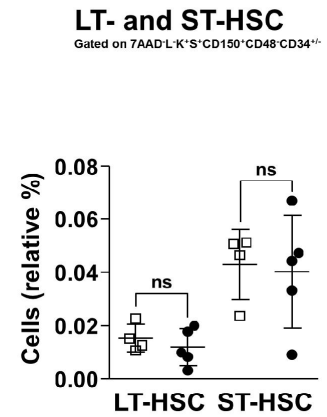

**HSC (absolute % of total BM cells)**

| Population                | LT-HSC   |          | ST-HSC   |         |
|---------------------------|----------|----------|----------|---------|
|                           | Control  | AE       | Control  | AE      |
| Number of animals tested  | 3        | 5        | 3        | 5       |
| Mean                      | 0.01187  | 0.01034  | 0.03633  | 0.04342 |
| Standard deviation        | 0.002214 | 0.006279 | 0.01146  | 0.02472 |
| Standard error of mean    | 0.001278 | 0.002808 | 0.006615 | 0.01105 |
| P value summary           | ns       |          | ns       |         |
| P value (unpaired t test) | 0.7064   |          | 0.6638   |         |

**HSC (relative % of gated cells)**

| Population                | LT-HSC  |        | ST-HSC  |        |
|---------------------------|---------|--------|---------|--------|
|                           | Control | AE     | Control | AE     |
| Number of animals tested  | 4       | 5      | 4       | 5      |
| Mean                      | 1.525   | 1.187  | 4.295   | 4.011  |
| Standard deviation        | 0.5221  | 0.6928 | 1.308   | 2.114  |
| Standard error of mean    | 0.261   | 0.3098 | 0.6538  | 0.9452 |
| P value summary           | ns      |        | ns      |        |
| P value (unpaired t test) | 0.4469  |        | 0.8218  |        |

## Supplementary Figure 12: Long-term AE expression does not alter the pool of LT- and ST-HSC in leukaemic mice

Representative FACS profiles of BM cells from R26/AE reconstituted C57BL/6 mice that have been DOX-induced for eighteen months are depicted. FACS plots showing LT- and ST-HSC were gated on 7AAD<sup>-</sup>L<sup>-</sup>K<sup>-</sup>S<sup>+</sup>/CD48<sup>-</sup>Flt3<sup>-</sup>/CD150<sup>+</sup> cells and subclassified for the expression of CD34<sup>-</sup> (LT-HSC) and CD34<sup>+</sup> (ST-HSC). The graph on the right shows relative percentages of control (white squares) and DOX-induced (black dots) cells within the LT- and ST-HSC populations with each square and dot representing one individual mouse. The two tables on the right indicate mean absolute (upper table) and mean relative (lower table) cell percentages, the number of animals that were analysed, standard deviations, standard errors of mean, p value summaries and p values for LT- and ST-HSC.



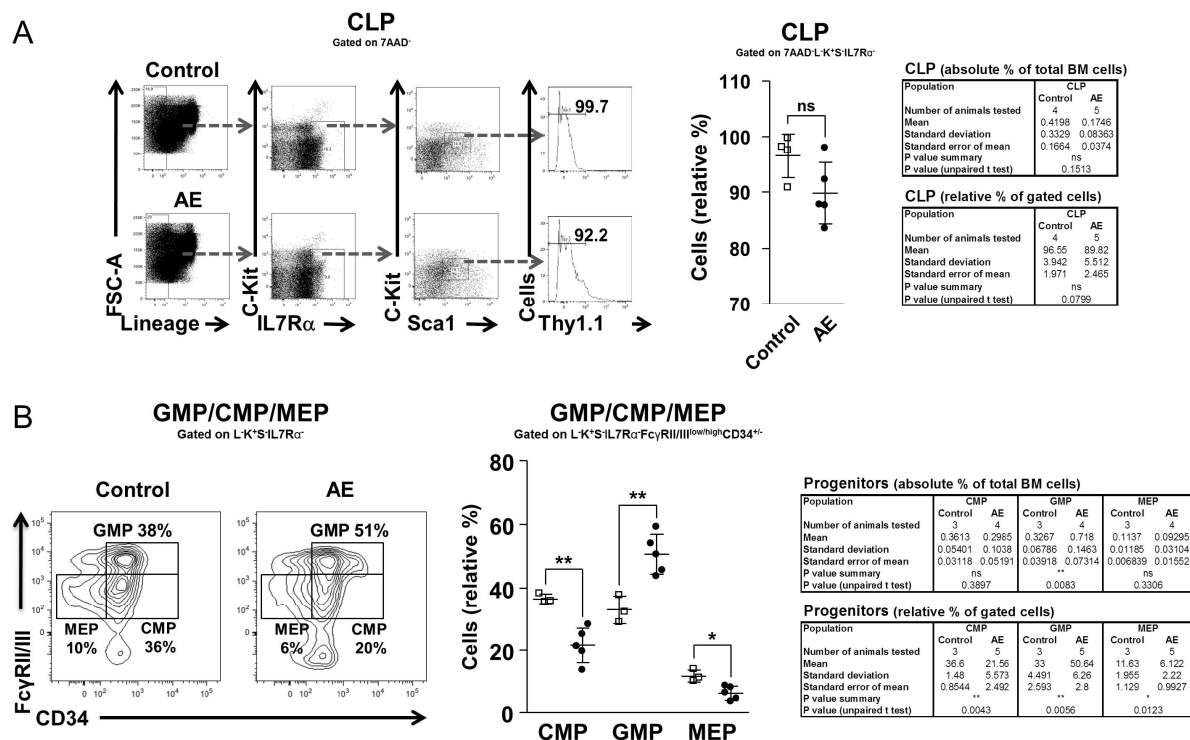

### Supplementary Figure 13: AE expression alters the relative percentages of CMP, GMP and MEP

(A) Representative FACS profiles of BM cells from R26/AE reconstituted C57BL/6 mice that have been DOX-induced for eighteen months are depicted. FACS plots showing CLP were gated on 7AAD<sup>-</sup>L<sup>-</sup>K<sup>int</sup>S<sup>int</sup>IL7 receptor  $\alpha^+$  and subclassified for the expression of GFP. The graph shows relative percentages of control (white squares) and DOX-induced (black dots) cells within the CLP population with each square and dot representing one individual mouse. The two tables on the right indicate mean absolute (upper table) and mean relative (lower table) cell percentages, the number of animals that were analysed, standard deviations, standard errors of mean, p value summaries and p values for CLP.

(B) Representative FACS profiles of BM cells from R26/AE reconstituted C57BL/6 mice that have been DOX-induced for eighteen months are depicted. GMP, CMP and MEP were gated on 7AAD<sup>-</sup>L<sup>-</sup>K<sup>int</sup>S<sup>int</sup>IL7 receptor  $\alpha^-$  expression and subclassified based on the expression of Fc $\gamma$  receptor, CD34 and GFP. The graph shows relative percentages of control (white squares) and DOX-induced (black dots) cells within the three analysed progenitor populations with each square and dot representing one individual mouse. The two tables on the right indicate mean absolute (upper table) and mean relative (lower table) cell percentages, the number of animals that were analysed, standard deviations, standard errors of mean, p value summaries and p values for each maturation stage.

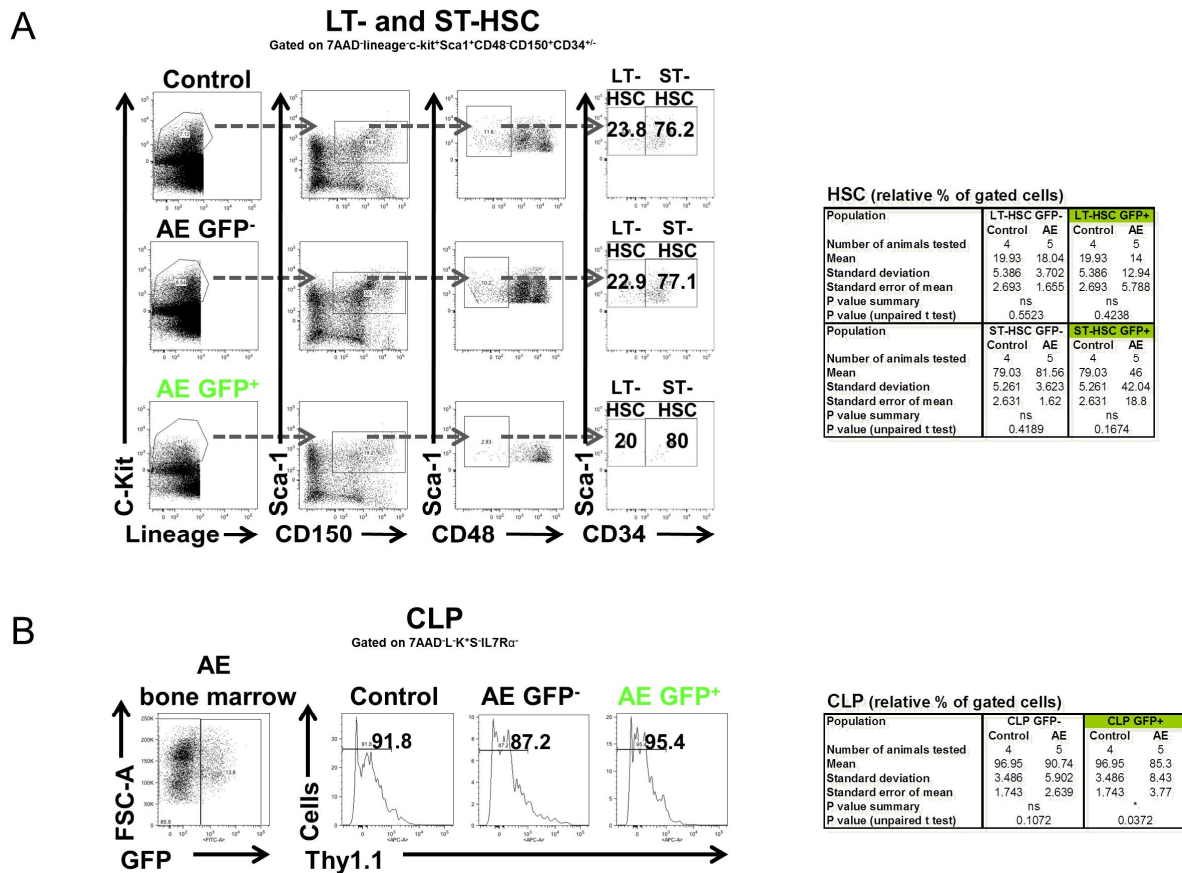

**Supplementary Figure 14: Analysis of GFP<sup>-</sup> and GFP<sup>+</sup> LT-, ST-HSC and CLP populations reveals no significant differences between control and leukaemic mice**

(A) Representative FACS profiles of BM cells from R26/AE reconstituted C57BL/6 mice that have been DOX-induced for eighteen months are depicted. FACS plots showing LT- and ST-HSC were gated on 7AAD<sup>-</sup>/L<sup>-</sup>K<sup>+</sup>S<sup>+</sup>/CD48<sup>-</sup>/CD150<sup>+</sup> cells and subclassified for the expression of CD34<sup>-</sup> (LT-HSC), CD34<sup>+</sup> (ST-HSC) and GFP. The tables at the right show the number of animals that were analysed, mean percentages of control, GFP<sup>-</sup> and GFP<sup>+</sup> cells, standard deviations, standard errors of mean, p value summaries and p values for LT-HSC (upper table) and ST-HSC (lower table).

(B) Representative FACS profiles of BM cells from R26/AE reconstituted C57BL/6 mice that have been DOX-induced for nine months are depicted. FACS plots showing CLP were gated on 7AAD<sup>-</sup>/L<sup>-</sup>K<sup>int</sup>S<sup>int</sup>/IL7 receptor  $\alpha$ <sup>+</sup> and subclassified for the expression of GFP. The table indicates the number of animals that were analysed, mean percentages of control, GFP<sup>-</sup> and GFP<sup>+</sup> cells, standard deviations and standard errors of mean, p value summaries and p values for CLP.

## GMP/CMP/MEP

Gated on 7AAD<sup>-</sup>L<sup>-</sup>K<sup>+</sup>S<sup>-</sup>IL7R $\alpha$ <sup>-</sup>

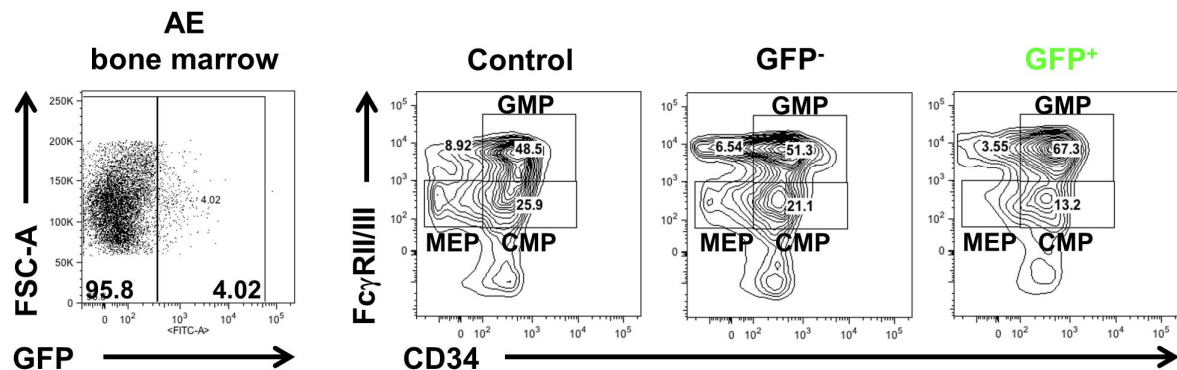

### Progenitors (relative % of gated cells)

| Population                | CMP GFP <sup>-</sup> |        | CMP GFP <sup>+</sup> |        |
|---------------------------|----------------------|--------|----------------------|--------|
|                           | Control              | AE     | Control              | AE     |
| Number of animals tested  | 3                    | 5      | 3                    | 5      |
| Mean                      | 25.43                | 16.89  | 25.43                | 13.8   |
| Standard deviation        | 4.801                | 5.409  | 4.801                | 1.442  |
| Standard error of mean    | 2.772                | 2.419  | 2.772                | 0.645  |
| P value summary           | ns                   |        | **                   |        |
| P value (unpaired t test) | 0.0661               |        | 0.0018               |        |
| Population                | GMP GFP <sup>-</sup> |        | GMP GFP <sup>+</sup> |        |
|                           | Control              | AE     | Control              | AE     |
| Number of animals tested  | 3                    | 5      | 3                    | 5      |
| Mean                      | 46.33                | 52.82  | 46.33                | 66.42  |
| Standard deviation        | 8.501                | 5.329  | 8.501                | 6.212  |
| Standard error of mean    | 4.908                | 2.383  | 4.908                | 2.778  |
| P value summary           | ns                   |        | **                   |        |
| P value (unpaired t test) | 0.2244               |        | 0.008                |        |
| Population                | MEP GFP <sup>-</sup> |        | MEP GFP <sup>+</sup> |        |
|                           | Control              | AE     | Control              | AE     |
| Number of animals tested  | 3                    | 5      | 3                    | 5      |
| Mean                      | 8.237                | 5.052  | 8.237                | 4.076  |
| Standard deviation        | 2.196                | 1.962  | 2.196                | 1.732  |
| Standard error of mean    | 1.268                | 0.8776 | 1.268                | 0.7747 |
| P value summary           | ns                   |        | *                    |        |
| P value (unpaired t test) | 0.0767               |        | 0.024                |        |

### Supplementary Figure 15: Relative percentages of GFP<sup>+</sup> but not GFP<sup>-</sup> CMP, GMP and MEP pools are altered in leukaemic mice

Representative FACS profiles of BM cells from R26/AE reconstituted C57BL/6 mice that have been DOX-induced for eighteen months are depicted. The first plot shows GFP<sup>-</sup> and GFP<sup>+</sup> cells in the BM of a leukaemic mouse with numbers indicating the percentages of GFP<sup>-</sup> and GFP<sup>+</sup> cells within the population of nucleated BM cells. In the contour plots, control, DOX-exposed GFP<sup>-</sup> and GFP<sup>+</sup> GMP, CMP and MEP are shown that were gated on 7AAD<sup>-</sup>/L<sup>-</sup>K<sup>+</sup>S<sup>-</sup>/IL7 receptor  $\alpha$ <sup>-</sup> expression and subclassified based on the expression of Fc $\gamma$  receptor, CD34 and GFP. The table below indicates the number of animals that were analysed, mean relative percentages of control, GFP<sup>-</sup> and GFP<sup>+</sup> cells, standard deviations, standard errors of mean, p value summaries and p values for CMP (upper table), GMP (table in the middle) and MEP (lower table).

A

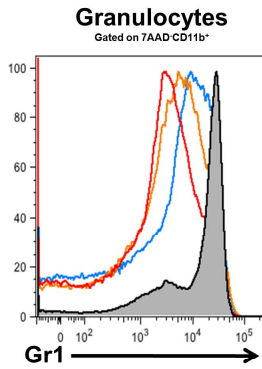

Granulocytes (relative % of GFP+/Gr1+ cells)

| Population                           | Control | +DOX | -DOX | -DOX |
|--------------------------------------|---------|------|------|------|
| Immature granulocytes (GFP+/Gr1 low) | 11.2    | 29.2 | 24.2 | 13.7 |
| Mature granulocytes (GFP+/Gr1 high)  | 42.6    | 16.7 | 29   | 33.5 |

B

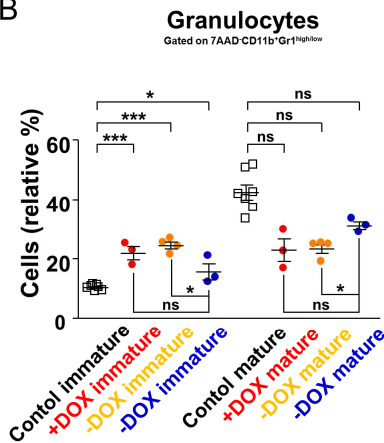

Granulocytes (absolute % of total cells)

| Population                | Control | +DOX  | Control | -DOX   | Control | -DOX  | +DOX   | -DOX  | -DOX   | -DOX  |
|---------------------------|---------|-------|---------|--------|---------|-------|--------|-------|--------|-------|
| Immature Granulocytes     | 7       | 3     | 7       | 4      | 7       | 3     | 3      | 3     | 4      | 3     |
| Mean                      | 5.63    | 17.83 | 5.630   | 19.73  | 5.630   | 12.50 | 17.83  | 12.50 | 19.73  | 12.50 |
| Standard deviation        | 2.001   | 3.722 | 2.001   | 1.793  | 2.001   | 4.118 | 3.722  | 4.118 | 1.793  | 4.118 |
| Standard error of mean    | 0.7563  | 2.149 | 0.7563  | 0.8966 | 0.7563  | 2.378 | 2.149  | 2.378 | 0.8966 | 2.378 |
| P value summary           | ***     |       | ***     |        | **      |       | ns     |       | ns     |       |
| P value (unpaired t test) | 0.0001  |       | <0.0001 |        | 0.006   |       | 0.1716 |       | 0.0239 |       |

| Population                | Control | +DOX  | Control | -DOX  | Control | -DOX   | +DOX   | -DOX   | -DOX   | -DOX   |
|---------------------------|---------|-------|---------|-------|---------|--------|--------|--------|--------|--------|
| Mature Granulocytes       | 24.36   | 18.50 | 24.36   | 18.90 | 24.36   | 24.70  | 18.50  | 24.70  | 18.90  | 24.70  |
| Mean                      | 11.97   | 4.976 | 11.97   | 2.135 | 11.97   | 1.473  | 4.976  | 1.473  | 2.135  | 1.473  |
| Standard deviation        | 4.523   | 2.873 | 4.523   | 1.068 | 4.523   | 0.8505 | 2.873  | 0.8505 | 1.068  | 0.8505 |
| P value summary           | ns      |       | ns      |       | ns      |        | ns     |        | ns     | *      |
| P value (unpaired t test) | 0.4488  |       | 0.3996  |       | 0.963   |        | 0.1073 |        | 0.0103 |        |

Granulocytes (relative % of gated cells)

| Population                | Control | +DOX  | Control | -DOX  | Control | -DOX  | +DOX   | -DOX  | -DOX   | -DOX  |
|---------------------------|---------|-------|---------|-------|---------|-------|--------|-------|--------|-------|
| Immature Granulocytes     | 7       | 3     | 7       | 4     | 7       | 3     | 3      | 3     | 4      | 3     |
| Mean                      | 10.38   | 22.07 | 10.38   | 24.63 | 10.38   | 15.70 | 22.07  | 15.70 | 24.63  | 15.70 |
| Standard deviation        | 0.9067  | 3.787 | 0.9067  | 2.281 | 0.9067  | 4.744 | 3.787  | 4.744 | 2.281  | 4.744 |
| Standard error of mean    | 0.3427  | 2.187 | 0.3427  | 1.140 | 0.3427  | 2.739 | 2.187  | 2.739 | 1.140  | 2.739 |
| P value summary           | ***     |       | ***     |       | *       |       | ns     |       | ns     | *     |
| P value (unpaired t test) | <0.0001 |       | <0.0001 |       | 0.016   |       | 0.1486 |       | 0.0202 |       |

| Population                | Control | +DOX  | Control | -DOX  | Control | -DOX  | +DOX   | -DOX  | -DOX   | -DOX  |
|---------------------------|---------|-------|---------|-------|---------|-------|--------|-------|--------|-------|
| Mature Granulocytes       | 7       | 3     | 7       | 4     | 7       | 3     | 3      | 3     | 4      | 3     |
| Mean                      | 42.93   | 23.13 | 42.93   | 23.50 | 42.93   | 31.37 | 23.13  | 31.37 | 23.50  | 31.37 |
| Standard deviation        | 6.755   | 6.616 | 6.755   | 2.934 | 6.755   | 2.301 | 6.616  | 2.301 | 2.934  | 2.301 |
| Standard error of mean    | 2.553   | 3.820 | 2.553   | 1.467 | 2.553   | 1.328 | 3.820  | 1.328 | 1.467  | 1.328 |
| P value summary           | **      |       | ***     |       | *       |       | ns     |       | ns     | *     |
| P value (unpaired t test) | 0.0027  |       | 0.0004  |       | 0.0228  |       | 0.1115 |       | 0.0124 |       |

## Supplementary Figure 16: Flow cytometric analysis of BM granulocytes reveals the reduction of immature myeloid cells in two previously leukaemic mice following the DOX switch

(A) Histogram plots of Gr1-expressing BM granulocytes for a control animal (black outline and filled in grey), a mouse continuously receiving DOX (+DOX, red line), a mouse shifted to a DOX-free diet presenting signs of progressing leukaemia (-DOX, orange line) and an animal that has been shifted to a DOX-free diet presenting signs of recovery and partial restoration of granulocytic maturation (-DOX, blue line). Note the right shift of the blue profile indicating the reduction of immature Gr1<sup>low</sup> and the increase of Gr1<sup>high</sup> cells. The table on the right indicates the relative percentages of GFP<sup>+</sup> mature and immature granulocytes for each individual mouse that is shown in the histogram.

(B) The graph on the left shows relative percentages of immature (Gr1<sup>low</sup>) and more mature (Gr1<sup>high</sup>) cells within the BM population of granulocytes for control mice (white squares), animals continuously receiving DOX (+DOX, red dots), animals that had been shifted to a DOX-free diet presenting signs of progressing leukaemia (-DOX, orange dots) and mice that had been shifted to a DOX-free diet presenting signs of recovery (-DOX, blue dots). The tables on the right indicate the mean absolute and relative percentages, the number of animals that were analysed, standard deviations, standard errors of mean, p value summaries and p values for all immature (upper tables) and mature granulocytes (lower tables).

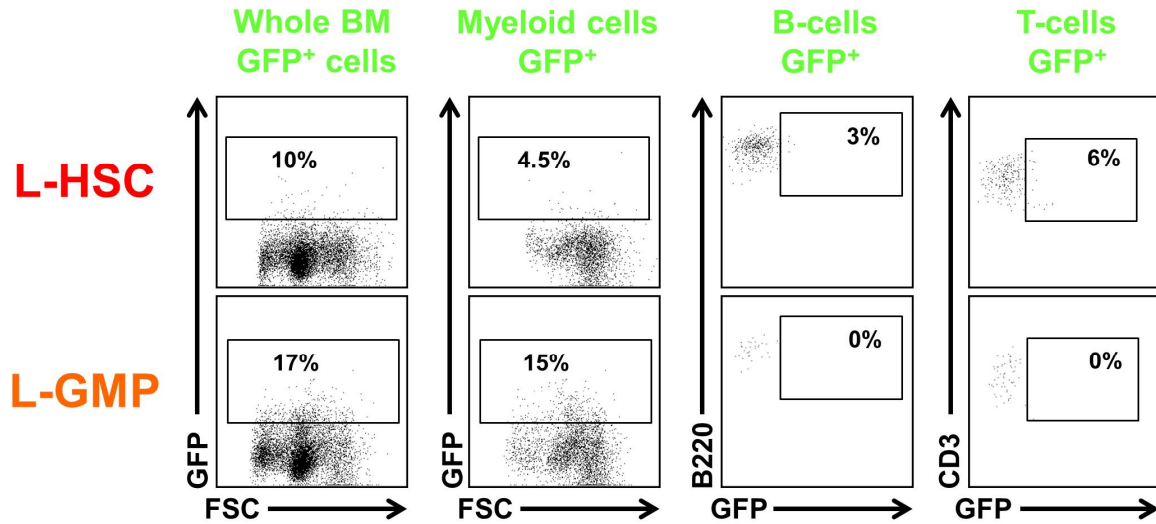

**Supplementary Figure 17: Post reconstitution flow cytometric analysis demonstrates that L-HSC reconstitute both lympho- and myelopoiesis whereas L-GMP only reconstitute myelopoiesis**

The upper panel shows representative FACS plots for an L-HSC- and the lower panel for an L-GMP-reconstituted mouse. Numbers indicate the percentages of GFP<sup>+</sup> cells in the BM (left plots) or in the myeloid, B and T cell fraction of peripheral blood samples. Note the absence of GFP-expressing T and B cells in the L-GMP-reconstituted mouse.

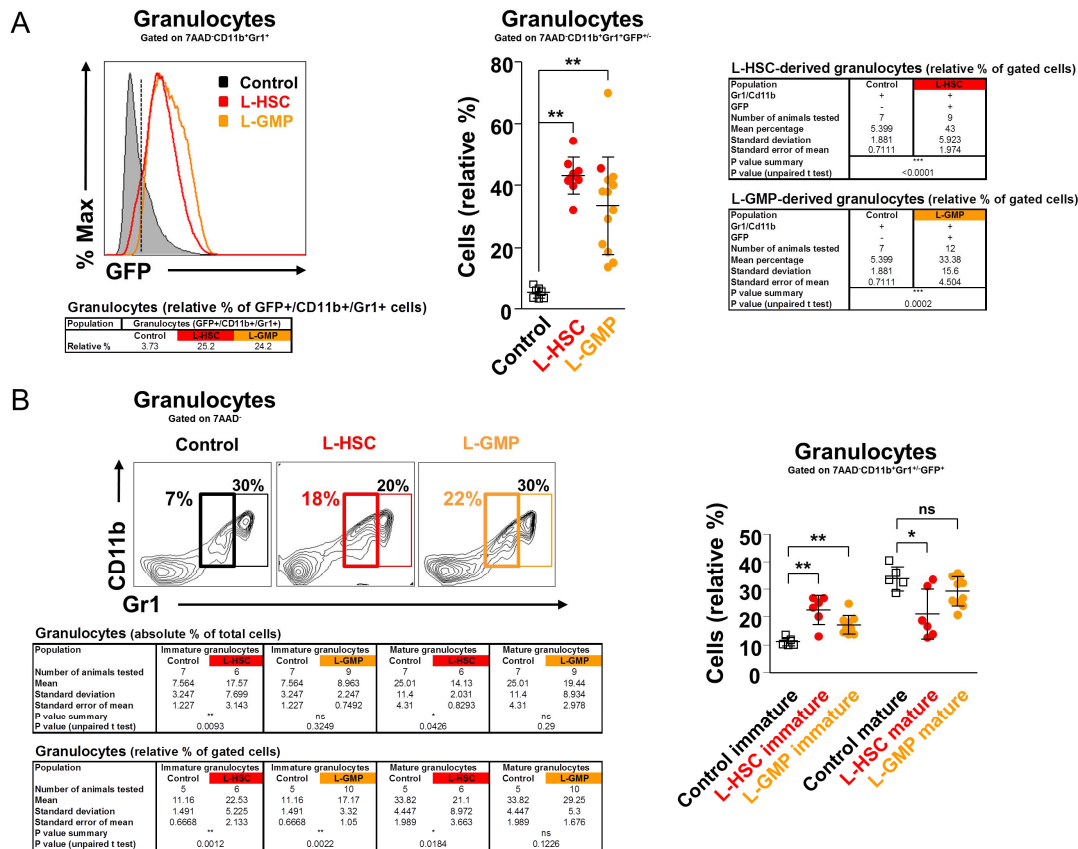

## Supplementary Figure 18: Flow cytometric analysis reveals differences in granulocytic maturation between L-HSC- and L-GMP-reconstituted mice

(A) Histogram plots of CD11b/Gr1-expressing granulocytes for a control animal (black outline and filled in grey), an L-HSC- (red line) and an L-GMP- (orange line) reconstituted mouse revealing the presence of GFP-expressing granulocytes in the BM of reconstituted mice. The table below indicates the relative percentages of GFP<sup>+</sup> granulocytes for each individual mouse that is shown in the histogram. The graph on the right shows increased relative percentages of CD11b<sup>+</sup>/Gr1<sup>+</sup> BM granulocytes in both L-HSC- (red dots) and L-GMP- (orange dots) reconstituted mice when compared to control mice (white squares). The two tables on the right indicate the mean relative cell percentages, number of animals that were analysed, standard deviations, standard errors of mean, p value summaries and p values for L-HSC-reconstituted (upper table) and L-GMP- (lower table) reconstituted animals.

(B) Contour plots depicting immature (CD11b<sup>+</sup>Gr1<sup>low</sup>) and mature (CD11b<sup>+</sup>Gr1<sup>high</sup>) granulocytes of control, L-HSC- and L-GMP-transplanted mice. Thick-framed boxes highlight immature granulocytes. The graph on the right shows relative percentages of cells for control (white squares), L-HSC- (red dots) and L-GMP- (orange dots) transplanted mice within the immature and mature granulocytic population with each square and dot representing one individual mouse. The two tables at the bottom indicate the mean absolute (upper table) and mean relative (lower table) cell percentages, the number of animals that were analysed, standard deviations, standard errors of mean, p value summaries and p values for control L-HSC- and L-GMP-transplanted mice. Note that immature CD11b<sup>+</sup>/Gr1<sup>low</sup> granulocytes are augmented in both L-HSC and L-GMP-transplanted mice whereas the percentage of more mature CD11b<sup>+</sup>/Gr1<sup>high</sup> cells is only significantly decreased in L-HSC-reconstituted animals but not in L-GMP-transplanted mice.



## INFORMATION ABOUT SUPPLEMENTARY TABLES

**Table S1** and **Table S2:** Whole transcriptome and mRNA profiles of Ctrl-, ST- and L-GMP populations are provided in Table S1 and Table S2.

**Table S3:** Table S3 contains lists of transcripts that were specifically increased, further up-regulated, newly transcribed, specifically down-regulated, further decreased or completely extinguished in L-GMP cells.

**Table S4:** Table S4 contains the list of human orthologous genes corresponding to the top 150 transcripts that were highly up-regulated or exclusively expressed in murine ST-GMP and in murine L-GMP indicating the rank in the gene list, the metric score and the individual enrichment score found in a cohort of 61 t(8;21) CBF AML patients.

**Table S5:** Table S5 contains the list of 17 human genes that were found to be on average two fold or more increased in a group of 61 t(8;21) patients as compared to a cohort of 69 healthy donors. In addition, these genes were silent or only very poorly transcribed in sorted primary human CD34+/CD38- cord blood HSC, CD34+/CD38low/CD36- cord blood HSC, primary human CD34+/CD38+ haematopoietic progenitors and unsorted Lin+/- human primary cord blood cells.

## MATERIALS AND METHODS

### Flow cytometry analysis and sorting

For staining of differentiated blood cell lineages we used antibodies against CD4, CD8, CD25, CD44, B220, IgM, Gr1, CD11b, Ter119, CD71, CD41 and CD3. Erythrocytes were removed by lysis with ACK buffer (Lonza) for 5 minutes at room temperature. Stem cells and progenitors were stained with a lineage cocktail containing antibodies against CD3, B220, CD11b, TER119 and Ly-6G followed by staining with antibodies against FcγRII/III, IL7Rα, CD34, CD150, c-Kit, Sca-1, CD48 and/or Flt-3. A list of all antibodies that were used in this study is shown below.

### Antibodies for detecting mature hematopoietic lineage markers

| Antigen | Fluorochrome | Company | Alternative Name           | Clone    |
|---------|--------------|---------|----------------------------|----------|
| B220    | PE           | BD      | CD45R                      | RA3-6B2  |
| B220    | APC          | BD      | CD45R                      | RA3-6B2  |
| CD3     | PE           | Caltag  |                            | 145-2C11 |
| CD4     | PE           | BD      | L3T4                       | GK1.5    |
| CD8     | PE           | BD      | Ly-2                       | 53-6.7   |
| CD8     | APC          | BD      | Ly-2                       | 53-6.7   |
| CD11b   | APC          | BD      | Mac-1; Integrin $\alpha_M$ | M1/70    |
| CD11b   | PE           | BD      | Mac-1; Integrin $\alpha_M$ | M1/70    |
| CD19    | PE           | BD      |                            | 1D3      |
| CD25    | PE-Cy7       | BD      |                            | PC61     |
| CD41    | PE           | BD      |                            | MWReg30  |
| CD44    | APC          | BD      | Pgp-1, H-CAM, Ly-24        | IM7      |

|        |        |        |               |             |
|--------|--------|--------|---------------|-------------|
| CD71   | Biotin | Caltag | Transferrin R | R17 217.1.4 |
| Gr1    | PE     | BD     | Ly-6C/ -6G    | RB6-8C5     |
| IgM    | APC    | BD     |               | II/41       |
| TER119 | PE     | BD     | Ly-76         | TER119      |

### Antibodies for detecting stem and progenitor cells

| Antigen    | Fluorochrome | Company     | Altern. Name        | Clone         |
|------------|--------------|-------------|---------------------|---------------|
| CD34       | PE           | Caltag      |                     | RAM34         |
| CD48       | APC          | Natutec     | BCM1                | HM48-1        |
| CD117      | APC          | BD          | c-Kit               | 2B8           |
| CD117      | APC-Alexa750 | Natutec     | c-Kit               | 2B8           |
| CD135      | PE-Cy5       | Natutec     | Flk-2, Flt-3, Ly-72 | A2F10         |
| CD150      | PE-Cy7       | Biozol      | SLAM-1              | TC15-12,F12.2 |
| FcγRII/III | APC          | BD          | CD16/32             | 2.4G2         |
| IL7Rα      | PE-Cy7       | BD          | CD127               | A7R34         |
| Sca-1      | PE           | Caltag      | Ly.6A/E             | D7            |
| Sca-1      | PE-Cy7       | eBioscience | Ly.6A/E             | D7            |
| Sca-1      | PerCp-Cy5.5  | eBioscience | Ly.6A/E             | D7            |

## Lineage cocktails

| Antigen          | Fluorochrome | Company | Composition | Clone   |
|------------------|--------------|---------|-------------|---------|
| Lineage cocktail | Pacific Blue | Natutec | CD3         | 17A2    |
|                  |              |         | CD45R/B220  | RA3-6B2 |
|                  |              |         | CD11b       | M1/70   |
|                  |              |         | TER-119     | TER-119 |
|                  |              |         | Ly-6G       | RB6-8C5 |

## Quantitative real-time PCR

The Kasumi-1 cell line (Asou et al, 1991) was cultivated in RPMI 1640 (GIBCO BRL) containing 10% fetal bovine serum. RNA was extracted from BM of non-induced and induced (three days DOX) compound R26/AE mice. L<sup>-</sup>K<sup>+</sup>S<sup>+</sup> cells (lineage PE-conjugated B220, CD41, CD3, Gr1, CD11c, CD11b and Ter119; APC c-Kit and PE-Cy7 Sca-1 conjugated) were sorted using a FACSVantage Cell Sorter (BD) from whole BM without gating on GFP<sup>+</sup> cells. For the isolation of differentiated blood cell lineages, anti-PE microbeads recognizing PE-conjugated B220, CD3, Gr1, CD11b or Ter119 (Milteny Biotec) were used. Purity of the isolated cells was in all cases > 95%. RNA extraction and DNase I treatment was performed with the RNeasy Mini Kit (Qiagen). RNA samples were reverse-transcribed with SuperScript II (Invitrogen) according to the manufacturer's instructions. Real-time PCR for detecting AE mRNA levels was performed on a Mastercycler Realplex4 (Eppendorf) using the ABsolute qPCR SYBR Green Mix (ABgene). Each sample was run in triplicate and three independent experiments were performed in each case. Non-specific DNA amplification was excluded by comparing experiments conducted in the presence and absence of reverse transcriptase.

Differences in cDNA input between samples were compensated by normalizing to the expression of hprt ( $\Delta C_t$ ). The fold-change value between each test sample was calculated according to Schmittgen (Schmittgen, 2001), calibrated relative to the amount of mRNA in the Kasumi-1 cell line and displayed as  $2^{-\Delta\Delta C_t}$ . Primers and cycling details are shown below.

### QPCR primers

|                         |                               |
|-------------------------|-------------------------------|
| AML1-ETO forward primer | 5'GCCCCGAGAACCTCGAAA3'        |
| AML1-ETO reverse primer | 5'TCCACACGTGAGTCTGGCATT3'     |
| hprt forward primer     | 5'GCTCGAGATGTCATGAAGGAGAT3'   |
| hprt reverse primer     | 5'AGCAGGTCAGCAAAGAACTTATAGC3' |

### QPCR cycling conditions

|                 |           |            |      |
|-----------------|-----------|------------|------|
| Thermal cycling |           |            |      |
|                 |           | 15 minutes | 95°C |
|                 | 40 cycles | 15 seconds | 95°C |
|                 |           | 30 seconds | 55°C |
|                 |           | 30 seconds | 72°C |
| Melting curve   |           |            |      |
|                 |           | 30 seconds | 95°C |
|                 |           | 30 seconds | 60°C |
|                 |           | 15 seconds | 95°C |

### BM transplantation for the analysis of phenotypes following short- and long-term DOX induction

BM cells were obtained from non-induced compound R26/AE donors. For the analysis of mice that were exposed to DOX for 8-10 months,  $5 \times 10^5$  whole BM donor cells were injected into the tail vein of irradiated RAG2<sup>-/-</sup> animals (4.5 Gy). For long-term DOX-induction experiments (DOX exposure 16-18 months) involving peripheral blood films, spleen weight, FACS analysis, histology of spleen, thymus, lymph nodes, liver, kidney and lung we used C57BL/6 recipients (irradiation  $2 \times 5.5$  Gy) that were tail vein injected with  $5 \times 10^5$  donor cells

from non-induced compound R26/AE mice and DOX-exposed for either 16 months (N=5) or 18 months (N=4). Spinal cord sections for histo-pathological analysis (Figure 3D) were obtained from RAG2<sup>-/-</sup> reconstituted recipients (4.5 Gy) that were injected with 5x10<sup>5</sup> BM cells from non-induced compound R26/AE donors and exposed to DOX for 20-22 months (N=4). In all experiments cohorts of mice that were reconstituted in the same fashion but not exposed to DOX were used as controls. Number of DOX-induced and control mice analysed in each experiment are indicated either in the Figure legends or in the tables of Supplementary Figures.

### **RNA-Seq**

Cell sorting: GMP (4 x 10<sup>4</sup> L<sup>-</sup>K<sup>+</sup>S<sup>+</sup>IL7R $\alpha$ <sup>-</sup>CD34<sup>+</sup>Fc $\gamma$ RII/III<sup>+</sup> cells) from non-induced compound R26/AE controls (Ctrl-GMP) or C57BL/6 recipients (2 x 5.5 Gy) that were injected with 5 x 10<sup>5</sup> non-induced R26/AE BM cells and exposed to DOX for ten days (ST-GMP) were sorted using a FACSAria cell sorter (BD). To obtain long-term DOX-induced leukaemic GMP (L-GMP), 5 x 10<sup>5</sup> BM cells from R26/AE-reconstituted C57BL/6 recipients that had been exposed to DOX for 18 month were injected into secondary C57BL/6 recipients (2 x 5.5 Gy) and the DOX regime was continued for an additional four month. At this point manifest leukaemia was confirmed by inspection of peripheral blood films (presence of circulating blasts), high WBC counts and splenomegaly. For obtaining L-GMP cells for the following RNA-Seq experiments, 4 x 10<sup>4</sup> L<sup>-</sup>K<sup>+</sup>S<sup>+</sup>IL7R $\alpha$ <sup>-</sup>CD34<sup>+</sup>Fc $\gamma$ RII/III<sup>+</sup> cells were preparatively sorted using a FACSAria cell sorter (BD). In all cases sorting efficiencies were confirmed by re-analysis of each sample (purity > 97%).

Next generation sequencing: RNA was extracted with the Pico Pure RNA Extraction Kit (Arcturus) according to the manufacturer's instructions. The resulting RNA was analysed



using an Agilent Bioanalyzer. RNA samples were amplified with Nugen`s Ovation RNA-Seq System and quantified by Qubit measurement.

Library construction: The TruSeq DNA Sample PrepKit (Illumina) was used and the resulting cDNAs were fragmented using AFA technology (Covaris). Subsequently, cDNA fragments were end repaired and 3` adenylated. Illumina`s TruSeq adaptors with integrated indices were ligated and the resultant fragments size selected using 2% E-Gels (Invitrogen). Enrichment was done by linear PCR and the resulting fragments were purified using Agencourt AMPure XP magnetic beads. Barcoded RNA-Seq libraries were clustered on the cBot using Truseq SR cluster kit v2.5. Fifty plus bp single end reads were obtained on the Illumina HiSeq2000 using Truseq SBS kit-HS 50 bp (Illumina).

Bioinformatics and data pre-processing: Raw output data was pre-processed according to the Illumina standard protocol including filtering for low quality reads and de-multiplexing.

RNA-Seq data acquisition: Sequence reads were aligned to the mm9 reference mouse genome sequence (Waterston et al, 2002) using bowtie (Langmead et al, 2009). Alignment coordinates were compared to the exon coordinates of RefSeq transcripts (Pruitt et al, 2007) and for each transcript the counts of overlapping alignments were recorded. Sequence reads that were not aligned to the genomic sequence were aligned to a database of all possible exon-exon junction sequences of the RefSeq transcript deposit. Finally, counts of reads aligning to splice junctions were aggregated with the respective transcript counts and normalized to RPKM (number of reads which map per kilobase of exon model per million mapped reads (Mortazavi et al, 2008)). The count data was analyzed for differential expression using the R/Bioconductor package DESeq (Anders & Huber, 2010) and normalized by edgeR (Robinson et al, 2010). Pathway analysis was performed with the Ingenuity IPA software and scatter plots were generated using ANTHEUS (Build 3.3.66).

### **Isolation and functional characterization of LSC**

To obtain long-term DOX-induced L-HSC and L-GMP,  $5 \times 10^5$  BM cells from R26/AE-reconstituted C57BL/6 recipients that had been exposed to DOX for 18 month were injected into secondary C57BL/6 recipients ( $2 \times 5.5$  Gy) that were kept on DOX. Four month later all animals were sacrificed and presented signs of leukaemic disease indicated by the presence of circulating blasts, high WBC counts and splenomegaly. To isolate L-HSC (defined as  $L^+K^+S^+CD150^+$ ) and L-GMP (defined as  $L^+K^+S^+IL7R\alpha^-CD34^+Fc\gamma RII/III^+$ ) whole BM of the sacrificed animals was subjected to preparative FACS using a FACSAria cell sorter (BD). In all cases sorting efficiencies were confirmed by re-analysis of each sample (purity > 97%). To test the potential of L-HSC and L-GMP for initiating and maintaining leukaemia (LSC-assay), we injected  $1 \times 10^3$  L-HSC (9 recipient mice) or  $2 \times 10^4$  GMP (10 recipient mice) together with  $2.5 \times 10^5$  supportive C57BL/6 BM cells into C57BL/6 ( $2 \times 5.5$  Gy) animals that were continued on DOX. Recipient mice were bled seven weeks post transplantation and reconstitution was confirmed by analysing GFP expression in peripheral granulocytes, B and T cells. Five month after the transfer all animals were analysed. FACS sorted L-HSC and L-GMP from age-matched R26/AE BM-reconstituted mice that were treated in the same manner as described above but had never been exposed to DOX were used as control cells in the LSC-assay.

### **Acute ablation of AE expression in leukemic mice**

In these experiments  $5 \times 10^5$  BM cells from R26/AE-reconstituted C57BL/6 recipients that had been exposed to DOX for 18 month were injected into secondary C57BL/6 recipients ( $2 \times 5.5$  Gy) and continued on DOX. Four month later all animals were sacrificed and presented signs of leukaemic disease indicated by the presence of circulating blasts, high WBC counts and splenomegaly. To be able to investigate the effect of AE ablation in mice that individually

progressed towards leukaemia and thus might have acquired different secondary mutations, we used three different sacrificed mice as BM donors and ten individual mice as recipients. In each case  $2.5 \times 10^5$  leukemic BM cells were co-injected together with  $2.5 \times 10^5$  supportive C57BL/6 BM cells into a single C57BL/6 mouse (2 x 5.5 Gy) and all animals were continued on DOX for an additional three month. At this point seven mice were switched to a DOX-free diet and three mice were continued on DOX. Four month later all animals were analysed. Age-matched R26/AE BM-reconstituted mice that were treated in the same manner as described above but had never been exposed to DOX were used as controls.

### **Colony-forming unit assay**

Bone marrow cells ( $1 \times 10^4$ ) of transplanted control and eight months AE-expressing recipients were seeded into methylcellulose-containing media (MethoCult 3434; StemCell Technologies). The cultures were plated in triplicate and incubated with 5% CO<sub>2</sub> at 37°C. After eight days, colonies were scored according to the manufacturer's instructions. In each case three control and three AE-expressing animals were analysed.

### **Routine haematologic assays and histopathology**

Peripheral blood counts were performed on an ADVIA120 Haematology Analyzer (Bayer) or an HAEMAVET HV950 (Drew). Peripheral blood films were air dried and subsequently stained with Giemsa. Organs were formalin-fixed (4% PBS buffered formaldehyde) embedded in paraffin, sectioned and stained with haematoxylin and eosin according to standard protocols. Images were generated using a BX45 Microscope equipped with a C4040 digital camera (Olympus) and imported into Photoshop 7.0 (Adobe Systems).

## **Conversion and comparison of murine ST AE- and leukaemia-associated transcripts with human t(8;21) CBF AML and non-leukaemic profiles**

For converting mouse RefSeq identifiers to orthologous Human Genome U133 Plus 2.0 Affymetrix IDs BioMart was used (<http://www.biomart.org>). To compare mouse and human gene expression profiles, confirmed t(8;21) AML and non-leukaemic gene expression signatures were extracted from GSE17855 (Balgobind et al, 2011), GSE6891 and GSE22056 (de Jonge et al, 2010; Verhaak et al, 2009) and GSE15061 (Mills et al, 2009) and normalized using the RMA procedure (Irizarry et al, 2003). To select L-GMP-specific genes that were absent or poorly expressed in human HSC, progenitors and normal blood cells, gene expression signatures from GSE30377 (Eppert et al, 2011) were extracted and normalized as above. For gene set enrichment analysis we applied the GSEA software package (Subramanian et al, 2005) and for determining the expression of genes in normal embryonic and adult tissues the Gene Enrichment Profiler program (Benita et al, 2010) was used.

## REFERENCES FOR MATERIALS AND METHODS

Anders S, Huber W (2010) Differential expression analysis for sequence count data. *Genome Biol* **11**: R106

Asou H, Tashiro S, Hamamoto K, Otsuji A, Kita K, Kamada N (1991) Establishment of a human acute myeloid leukemia cell line (Kasumi-1) with 8;21 chromosome translocation. *Blood* **77**: 2031-2036

Balgobind BV, Van den Heuvel-Eibrink MM, De Menezes RX, Reinhardt D, Hollink IH, Arentsen-Peters ST, van Wering ER, Kaspers GJ, Cloos J, de Bont ES, Cayuela JM, Baruchel A, Meyer C, Marschalek R, Trka J, Stary J, Beverloo HB, Pieters R, Zwaan CM, den Boer ML (2011) Evaluation of gene expression signatures predictive of cytogenetic and molecular subtypes of pediatric acute myeloid leukemia. *Haematologica* **96**: 221-230

Benita Y, Cao Z, Giallourakis C, Li C, Gardet A, Xavier RJ (2010) Gene enrichment profiles reveal T-cell development, differentiation, and lineage-specific transcription factors including ZBTB25 as a novel NF-AT repressor. *Blood* **115**: 5376-5384

de Jonge HJ, Valk PJ, Veeger NJ, ter Elst A, den Boer ML, Cloos J, de Haas V, van den Heuvel-Eibrink MM, Kaspers GJ, Zwaan CM, Kamps WA, Löwenberg B, de Bont ES (2010) High VEGFC expression is associated with unique gene expression profiles and predicts adverse prognosis in pediatric and adult acute myeloid leukemia. *Blood* **116**: 1747-1754

Eppert K, Takenaka K, Lechman ER, Waldron L, Nilsson B, van Galen P, Metzeler KH, Poepl A, Ling V, Beyene J, Canty AJ, Danska JS, Bohlander SK, Buske C, Minden MD, Golub TR, Jurisica I, Ebert BL, Dick JE (2011) Stem cell gene expression programs influence clinical outcome in human leukemia. *Nat Med* **17**: 1086-1093

Irizarry RA, Bolstad BM, Collin F, Cope LM, Hobbs B, Speed TP (2003) Summaries of Affymetrix GeneChip probe level data. *Nucleic Acids Res* **31**: e15

Langmead B, Trapnell C, Pop M, Salzberg SL (2009) Ultrafast and memory-efficient alignment of short DNA sequences to the human genome. *Genome Biol* **10**: R25

Mills KI, Kohlmann A, Williams PM, Wieczorek L, Liu WM, Li R, Wei W, Bowen DT, Loeffler H, Hernandez JM, Hofmann WK, Haferlach T (2009) Microarray-based classifiers and prognosis models identify subgroups with distinct clinical outcomes and high risk of AML transformation of myelodysplastic syndrome. *Blood* **114**: 1063-1072

Mortazavi A, Williams BA, McCue K, Schaeffer L, Wold B (2008) Mapping and quantifying mammalian transcriptomes by RNA-Seq. *Nat Methods* **5**: 621-628

Pruitt KD, Tatusova T, Maglott DR (2007) NCBI reference sequences (RefSeq): a curated non-redundant sequence database of genomes, transcripts and proteins. *Nucleic Acids Res* **35**: D61-65

Robinson MD, McCarthy DJ, Smyth GK (2010) edgeR: a Bioconductor package for differential expression analysis of digital gene expression data. *Bioinformatics* **26**: 139-140

Schmittgen T (2001) Real-time quantitative PCR. *Methods* **25**: 383-385

Subramanian A, Tamayo P, Mootha VK, Mukherjee S, Ebert BL, Gillette MA, Paulovich A, Pomeroy SL, Golub TR, Lander ES, Mesirov JP (2005) Gene set enrichment analysis: a knowledge-based approach for interpreting genome-wide expression profiles. *Proc Natl Acad Sci U S A* **102**: 15545-15550

Verhaak RG, Wouters BJ, Erpelinck CA, Abbas S, Beverloo HB, Lugthart S, Löwenberg B, Delwel R, Valk PJ (2009) Prediction of molecular subtypes in acute myeloid leukemia based on gene expression profiling. *Haematologica* **94**: 131-134

Waterston RH, Lindblad-Toh K, Birney E, Rogers J, Abril JF, Agarwal P, Agarwala R, Ainscough R, Alexandersson M, An P, Antonarakis SE, Attwood J, Baertsch R, Bailey J, Barlow K, Beck S, Berry E, Birren B, Bloom T, Bork P, Botcherby M, Bray N, Brent MR, Brown DG, Brown SD, Bult C, Burton J, Butler J, Campbell RD, Carninci P, Cawley S, Chiaromonte F, Chinwalla AT, Church DM, Clamp M, Clee C, Collins FS, Cook LL, Copley RR, Coulson A, Couronne O, Cuff J, Curwen V, Cutts T, Daly M, David R, Davies J, Delehaunty KD, Deri J, Dermitzakis ET, Dewey C, Dickens NJ, Diekhans M, Dodge S, Dubchak I, Dunn DM, Eddy SR, Elnitski L, Emes RD, Eswara P, Eyraas E, Felsenfeld A, Fewell GA, Flicek P, Foley K, Frankel WN, Fulton LA, Fulton RS, Furey TS, Gage D, Gibbs RA, Glusman G, Gnerre S, Goldman N, Goodstadt L, Grafham D, Graves TA, Green ED, Gregory S, Guigó R, Guyer M, Hardison RC, Haussler D, Hayashizaki Y, Hillier LW, Hinrichs A, Hlavina W, Holzer T, Hsu F, Hua A, Hubbard T, Hunt A, Jackson I, Jaffe DB, Johnson LS, Jones M, Jones TA, Joy A, Kamal M, Karlsson EK, Karolchik D, Kasprzyk A, Kawai J, Keibler E, Kells C, Kent WJ, Kirby A, Kolbe DL, Korf I, Kucherlapati RS, Kulbokas EJ, Kulp D, Landers T, Leger JP, Leonard S, Letunic I, Levine R, Li J, Li M, Lloyd C, Lucas S, Ma B, Maglott DR, Mardis ER, Matthews L, Mauceli E, Mayer JH, McCarthy M, McCombie WR, McLaren S, McLay K, McPherson JD, Meldrim J, Meredith B, Mesirov JP, Miller W, Miner TL, Mongin E, Montgomery KT, Morgan M, Mott R, Mullikin JC, Muzny DM, Nash WE, Nelson JO, Nhan MN, Nicol R, Ning Z, Nusbaum C, O'Connor MJ, Okazaki Y, Oliver K, Overton-Larty E, Pachter L, Parra G, Pepin KH, Peterson J, Pevzner P, Plumb R, Pohl CS, Poliakov A, Ponce TC, Ponting CP, Potter S, Quail M, Reymond A, Roe BA, Roskin KM, Rubin EM, Rust AG, Santos R, Sapojnikov V, Schultz B, Schultz J, Schwartz MS, Schwartz S, Scott C, Seaman S, Searle S, Sharpe T, Sheridan A, Shownkeen R, Sims S, Singer JB, Slater G, Smit A, Smith DR, Spencer B, Stabenau A, Stange-Thomann N, Sugnet C, Suyama M, Tesler G, Thompson J, Torrents D, Trevaskis E, Tromp J, Ucla C, Ureta-Vidal A, Vinson JP, Von Niederhausern AC, Wade CM, Wall M, Weber RJ, Weiss RB, Wendl MC, West AP, Wetterstrand K, Wheeler R, Whelan S, Wierzbowski J, Willey D, Williams S, Wilson RK, Winter E, Worley KC, Wyman D, Yang S, Yang SP, Zdobnov EM, Zody MC,

Lander ES, Consortium MGS (2002) Initial sequencing and comparative analysis of the mouse genome. *Nature* **420**: 520-562
